# 1 **Genomic assessment of local adaptation in dwarf birch to** 2 **inform assisted gene flow**

3 James S. Borrell<sup>1</sup>, Jasmin Zohren<sup>2</sup>, Richard A. Nichols<sup>3</sup>, & Richard J. A. Buggs<sup>1,3</sup>

4 <sup>1</sup>Jodrell Laboratory, Royal Botanic Gardens, Kew, Richmond, Surrey, TW9 3DS, UK.

5 <sup>2</sup>Sex Chromosome Biology Lab, the Francis Crick Institute, 1 Midland Road, London, NW1 1AT, UK

6 <sup>3</sup>School of Biological and Chemical Sciences, Queen Mary University of London, London E1 4NS, UK.

7  
8 Contact: [j.borrell@kew.org](mailto:j.borrell@kew.org), [jasmin.zohren@crick.ac.uk](mailto:jasmin.zohren@crick.ac.uk), [r.a.nichols@qmul.ac.uk](mailto:r.a.nichols@qmul.ac.uk), [r.buggs@kew.org](mailto:r.buggs@kew.org)

## 9 10 **Abstract**

11 When populations of a rare species are small, isolated and declining under climate change, some  
12 populations may become locally maladapted. Detecting this maladaptation may allow effective  
13 rapid conservation interventions, even if based on incomplete knowledge. Population  
14 maladaptation may be estimated by finding genome-environment associations (GEA) between  
15 allele frequencies and environmental variables across a local species range, and identifying  
16 populations whose allele frequencies do not fit with these trends. We can then design assisted  
17 gene flow strategies for maladapted populations, to adjust their allele frequencies, entailing  
18 lower levels of intervention than with undirected conservation action. Here, we investigate this  
19 strategy in Scottish populations of the montane plant dwarf birch (*Betula nana*). In genome-  
20 wide single nucleotide polymorphism (SNP) data we found 267 significant associations  
21 between SNP loci and environmental variables. We ranked populations by maladaptation  
22 estimated using allele frequency deviation from the general trends at these loci; this gave a  
23 different prioritization for conservation action than the Shapely Index, which seeks to preserve  
24 rare neutral variation. Populations estimated to be maladapted in their allele frequencies at loci  
25 associated with annual mean temperature were found to have reduced catkin production. Using

26 an environmental niche modelling (ENM) approach, we found annual mean temperature  
27 (35%), and mean diurnal range (15%), to be important predictors of the dwarf birch  
28 distribution. Intriguingly, there was a significant correlation between the number of loci  
29 associated with each environmental variable in the GEA, and the importance of that variable in  
30 the ENM. Together, these results suggest that the same environmental variables determine both  
31 adaptive genetic variation and species range in Scottish dwarf birch. We suggest an  
32 assisted gene flow strategy that aims to maximize the local adaptation of dwarf birch  
33 populations under climate change by matching allele frequencies to current and future  
34 environments.

## 35 **Keywords**

36 Landscape genomics, conservation genetics, environmental association analysis, evolutionary  
37 conservation, adaptive potential, climate change, assisted gene flow, provenance matching.

38

39

40

41

42

43

44

45

## 46 **Introduction**

47 Climate change is predicted to become a major driver of global biodiversity loss (Bellard et al.,  
48 2012; Urban, 2015). Species that lack relevant phenotypic plasticity (Gratani, 2014; Nicotra et  
49 al., 2010) may survive environmental changes by dispersing to new locations, consequently  
50 tracking conditions they are currently adapted to (Aitken et al. 2008; Meier et al. 2012), or  
51 remaining in the same location and rapidly evolving adaptation to their new environments from  
52 standing genetic variation or gene flow (Aitken et al., 2008; Alberto et al., 2013). Migration in  
53 response to rapid climate change may be particularly difficult for plants (Corlett and Westcott,  
54 2013; Hampe and Petit, 2005; Zhu et al., 2012). In some cases plants lack the dispersal ability  
55 to keep pace with accelerated climate shifts (Loarie et al., 2009), there is an absence of potential  
56 habitat at higher latitudes (McKenney et al., 2007) and altitudes (Engler et al., 2011), or suitable  
57 new habitats may be separated by too large distances (Meier et al., 2012). In these cases,  
58 conservation managers aiming to prevent extinction of species or populations face a choice  
59 between relying on *in situ* evolution to track the environmental change, or attempting  
60 conservation interventions such as assisted migration or assisted gene flow that seeks to  
61 enable, facilitate or accelerate adaptation.

62 To evaluate whether interventions are appropriate, a first step is understanding current local  
63 adaptation and the potential for adaptation to future environments (Davis et al., 2005;  
64 Hoffmann et al., 2017; Funk et al 2019). The classical way to identify local adaptation is via  
65 reciprocal transplant experiments (Kawecki and Ebert, 2004; Leimu and Fischer, 2008; Pardo-  
66 Diaz et al., 2015). However, this approach is often unfeasible for wild organisms with long  
67 generation times in need of urgent conservation, meaning that more rapid approaches using  
68 genomics are desirable (Williams et al., 2008).

69 Genotype-environment association (GEA; also referred to as environmental association  
70 analysis, EAA) methods are increasingly used to identify loci involved in local adaptation  
71 (Abebe et al., 2015; Ahrens et al., 2018; Bay et al., 2017; Coop et al., 2010; Flanagan et al., 2018;

72 Günther and Coop, 2013; Rellstab et al., 2015; Funk et al 2019). These approaches detect  
73 replicated signatures of selection (SNPs that deviate strongly from estimated neutral  
74 population structure) across many independent populations. Thus far the majority of studies  
75 to apply GEA in tree species have been targeted at candidate genes, and surveyed fewer than  
76 350 loci (Keller et al., 2012; Nadeau et al., 2016; Rellstab et al., 2016; Wang et al., 2016).

77 Building on the assumption that GEA captures an important component of locally adaptive  
78 allelic variation, especially if based on genome-wide markers, we may extend it to rapidly assess  
79 local adaptation and adaptive potential within populations. The principal of this approach is the  
80 detection of discordance between genotype and environment, in certain populations, as an  
81 indicator of reduced local adaptation and vulnerability to future demographic decline (Alberto  
82 et al., 2013). In a previous study, Rellstab *et al.* (2016) developed a model to estimate the  
83 average change in allele frequency at environmentally-associated loci that would be required  
84 to respond to projected future environmental conditions. They based this estimate on the allele  
85 frequency changes that would maintain the present-day associations between genotype and  
86 environment and term this mismatch, the risk of non-adaptedness (RONA). For clarity we term  
87 this 'future risk of non-adaptedness' (f-RONA) and comment that rather than a 'risk' this is a  
88 forecast, but for consistency we maintain the same terminology in this manuscript. This  
89 approach to estimating adaptation has many simplifying assumptions. Environmental variation  
90 in nature is complex, as are the mechanisms by which organisms adapt to them, but as Funk et  
91 al (2019) argue, any available evidence may improve conservation decision making.

92 Here, we extend the work of Rellstab *et al.* (2016) to explicitly define c-RONA, the 'current risk  
93 of non-adaptedness', that is the average change in allele frequency at climate-associated loci  
94 required to match our estimate of the optimum for current climatic conditions (for a given  
95 environmental factor). Current risks are likely to be particularly important for species that are  
96 already declining due to climate change, and have small isolated populations. Furthermore, we

97 extend the univariate RONA model to a multi-locus analysis of genome-wide markers, and use  
98 best linear unbiased prediction (BLUP) to improve our estimate of the effect of each allele.

99 In populations where c-RONA is high, local genotypes would not match local environmental  
100 variables as expected. Therefore, a possible management intervention is to use assisted gene  
101 flow (AGF) to introduce more appropriate alleles or adjust population allele frequencies. Here,  
102 AGF is defined as the managed movement of individuals or gametes between populations, from  
103 source populations that have been selected with the aim of accelerating adaptation, so that it is  
104 faster than would occur by passive natural dispersal alone (Aitken and Whitlock, 2013). This  
105 AGF strategy could be used to inform sourcing of seed stock for reforestation programs  
106 (Boshier et al., 2015) and mitigate maladaptation to future climate (Aitken and Bemmels, 2016;  
107 Havens et al., 2015; Jin et al., 2016). Importantly, only modest translocation of genotypes may  
108 enhance adaptation by introducing genetic variation upon which selection can act to further  
109 refine local allele frequencies (Bay et al., 2017; Pavlova et al., 2017). Conversely such  
110 interventions could have negative effects (i.e. outbreeding depression) if they cause gene flow  
111 between populations with undetected adaptive differentiation (Frankham et al., 2011; Pavlova  
112 et al., 2017). We note that where target populations are small, maladapted and dominated by  
113 drift, Assisted Gene Flow is equivalent to Genetic Rescue (see Aitken and Whitlock (2013) for a  
114 detailed review).

115 If AGF is to be effective, there must be appropriate populations from which to source migrants.  
116 Such populations might be found towards the species' retreating range edge or other locations  
117 where environmental conditions are closer to those anticipated in the future (Olson et al.,  
118 2013). To design a sampling strategy that encompasses both environmental gradients and  
119 declining range edge populations threatened by environmental change, we can use  
120 environmental niche models (ENMs) (Maguire et al., 2015). ENMs project the distribution of  
121 species' ranges under current and future climate scenarios based on observation data and can  
122 guide effective sampling (Elith and Leathwick, 2009). ENMs are also an established tool for

123 conservation practitioners seeking to understand major climatic selection pressures and  
124 projected range shifts for threatened species, but often lack integration and comparison with  
125 genomic assays of local adaptation (Hällfors et al., 2015; Razgour et al., 2019).

126 Here, we conduct GEA and ENM analysis of wild populations of dwarf birch (*Betula nana*), for  
127 which we have field observation and genome-wide population genetic data. In the UK, dwarf  
128 birch is a nationally scarce montane tree that has experienced an accelerated decline in recent  
129 decades, likely due to the combined impact of anthropogenic climate change and moorland  
130 management that permits over-browsing and burning (Aston, 1984; Borrell et al., 2018; Wang  
131 et al., 2014; Zohren et al., 2016). Dwarf birch, like many tree species, is the focus of a  
132 conservation program to restore populations, delimit management units and prioritise the  
133 protection of important genetic diversity (Koskela et al., 2013). Germplasm collection from  
134 central Scottish Highland populations is already underway for reintroduction to other parts of  
135 the species former range (pers. obs. J Borrell). Previous research by our group has found that  
136 despite extensive fragmentation, most populations of dwarf birch in the UK contain diversity  
137 comparable to that of large, unfragmented Scandinavian populations (Borrell et al., 2018).  
138 Nevertheless, we concluded that this diversity has become increasingly partitioned among  
139 populations. In other words, much of the adaptive diversity in dwarf birch is still extant in the  
140 UK, but due to restricted gene flow and dispersal, marginal populations may be maladapted due  
141 to a failure to track environmental change, or by drift of adaptive alleles away from their  
142 optimum frequency. There is limited potential for naturally occurring gene flow to enhance  
143 future adaptation in many populations.

144 In species subject to conservation management such as dwarf birch, evolutionary processes  
145 have sometimes been overlooked, despite the importance of adaptation to species persistence  
146 (Eizaguirre and Baltazar-Soares, 2014; Fitzpatrick and Keller, 2015). Therefore the adaptive  
147 potential of populations may be underrepresented in conservation prioritization strategies  
148 (Funk et al., 2019; Harrisson et al., 2014). For example, where genetic diversity information is

149 available to conservationists, metrics that score populations on neutral genetic distinctiveness,  
150 such as the Shapley Index are often used (Haake et al., 2007; Isaac et al., 2007; Volkmann et al.,  
151 2014). However there is no guarantee that neutral and adaptive diversity will be correlated  
152 (Bonin et al., 2007), and indeed approaches designed solely to promote or conserve neutral  
153 diversity may be harmful (Reed and Frankham, 2003; Weeks et al., 2016). Therefore evaluating  
154 adaptive diversity, rather than using more established metrics of genetic diversity should  
155 improve the prioritisation decisions in species management, though see Kardos and Shafer,  
156 (2018) for potential pitfalls.

157 To explore potential management strategies for dwarf birch, that takes into account local  
158 adaptation and evolutionary potential, we first characterise the species' range using ENMs  
159 under present and projected future climate scenarios. We evaluate these ENMs by assessing  
160 whether populations on the margins of the inferred distribution had lower scores for  
161 phenotypic and fitness proxies for local adaptation. Second, we use GEA to survey putative  
162 adaptive loci across the species' range and estimate c-RONA to identify populations with a  
163 discordance between genotype and environment. The combined ENM and GEA data present an  
164 opportunity to test the hypothesis that limiting environmental variables (which have higher  
165 discriminatory power in an ENM) have more genomic loci associated with them in GEA, perhaps  
166 as a result of stronger selection for adaptation (an alternative would be that certain variables  
167 limit species' ranges precisely because they lack genetic adaptation). We provide preliminary  
168 evidence in support of this hypothesis in dwarf birch. Third, we evaluate our estimates of non-  
169 adaptedness (c-RONA) of dwarf birch populations against the Shapley Index, an existing  
170 conservation prioritization most often applied to neutral markers. Finally, we illustrate a  
171 strategy of AGF to maximize adaptive genetic diversity and hence sustain the adaptive potential  
172 of British dwarf birch populations. We discuss the advantages and limitations of this approach  
173 in the context of managing dwarf birch and other plants exposed to rapid environmental  
174 change.

## 175 **Methods**

### 176 **Environmental niche modelling**

177 To determine the environmental variables influencing the present and future distribution of  
178 dwarf birch in the UK, we developed an ENM based on 763 resampled fine-scale ( $\leq 1$  km)  
179 records from the period 1960-present. Records were sourced from national databases,  
180 conservation partners and fieldwork observations (see Borrell *et al.* 2018). Nineteen  
181 bioclimatic layers were obtained from the WorldClim database ([www.worldclim.org](http://www.worldclim.org)) at 1km  
182 resolution (Hijmans *et al.*, 2005), for the period 1960-1990, including 11 temperature and eight  
183 precipitation derived variables reflecting annual trends, seasonality and limiting  
184 environmental factors. High resolution elevation data was used to compute slope and aspect  
185 terrain characteristics using the *Raster* package (Hijmans & Etten, 2012) in R software (R  
186 Development Core Team, 2014). These variables are indicators of soil moisture, erosion, wind  
187 and solar radiation (Hoersch *et al.*, 2002). To avoid overfitting, we removed multiple highly  
188 correlated variables (correlation coefficient  $>0.7$ ), retaining 10 for analysis (preferring less  
189 derived, e.g. Annual Mean Temperature, rather than Monthly or Quarterly values) (Table 1,  
190 Figure S1). Elevation was excluded due to its high correlation with temperature (Parolo *et al.*,  
191 2008). Temperature was retained because it captures the projected change in climate change  
192 models, whilst elevation does not. All retained variables were standardized to a mean of zero  
193 and unit variance. Eight further datasets consisting of the same retained variables were  
194 generated under four representative concentration pathways (RCP) defined by the  
195 Intergovernmental Panel on Climate Change Fifth Assessment (IPCC, 2014a) at each of two  
196 future time points (2045-65 and 2081-2100). These projections allow estimation of future  
197 temperature and precipitation values across the study area derived from the Community  
198 Climate System Model (Gent *et al.*, 2011) (Table S1).

199 The ENMs were generated using MaxEnt (Phillips *et al.*, 2006) within the *dismo* package  
200 (Hijmans *et al.*, 2011). We performed 50 randomly subsampled replicate runs with 25% of



201 observations retained for cross-validation. Models were further evaluated using a binomial test  
202 of omission rate and Area Under the Receiver Operating Characteristic Curve (AUC). A species  
203 occurrence threshold to assess changes in occupied area was defined by ‘maximum training  
204 sensitivity plus specificity’, which optimizes the trade-off between commission and omission  
205 errors (Liu et al., 2016). Rank and percentage contribution of environmental variables is  
206 reported here, as these have been demonstrated to capture biologically important factors  
207 (Searcy & Shaffer, 2016).

### 208 **Phenotypic data and habitat suitability projections**

209 We identified 29 dwarf birch populations that encompass the extant UK range (Table 2, Figure  
210 S2). To test the performance of our ENM, we collected extensive phenotypic measurements of  
211 traits related to reproductive output and fitness in 20-30 individuals per population in June-  
212 August 2013. These included: the number of male and female catkins, plant area, plant height  
213 and diameter of the largest stem. Cambial tissue samples were retained for genetic analysis. A  
214 subset of 18 populations was also tested for seed viability in germination experiments, a fitness  
215 proxy relevant to population persistence (Alsos et al., 2003). Seed were collected in late  
216 summer, over-wintered at 4°C then kept in moist conditions at 18-20°C with a 14h photoperiod  
217 for 60 days the following spring . For nine of these populations, 100-day survival of seedlings  
218 during the following Spring was measured (See Supplementary Materials for details).

219 To assess change in habitat quality across the study area, we first plotted the ENM derived  
220 habitat suitability index (HSI) estimates for all populations under current and future conditions.  
221 Second, ENM performance was assessed using a generalized linear model with a quasipoisson  
222 error distribution to test for a relationship between present time HSI estimates and mean  
223 population catkin counts. We also tested for a relationship between HSI (explanatory variable)  
224 and mean germination rates (response variable) using a quasibinomial error distribution. Here

225 we are explicitly testing the hypothesis that plants displayed greater reproductive output in  
226 locations with a higher ENM derived HSI.

## 227 **RAD sequencing**

228 The genetic samples used in this study are a subset of those described in (Borrell et al., 2018).  
229 Briefly, DNA was extracted from 130 individuals (Table 2) and submitted to Floragenex  
230 (Oregon, USA) for 100bp single-end RAD sequencing with the enzyme *Pst*I. Raw reads were  
231 filtered using Stacks v1.35 (Catchen et al., 2013) and aligned to the dwarf birch genome,  
232 retaining only reads that align uniquely (Wang et al., 2013) using Bowtie2 (Langmead and  
233 Salzberg, 2012) and the *ref\_map.pl* pipeline. SNPs were called with a minimum depth of 5, the  
234 bounded model and a minimum log likelihood of -20, with corrections made using *rxstacks*.  
235 Finally, we filtered for loci present in  $\geq 8$  populations, and a minor allele frequency  $> 0.05$ .

## 236 **Genomic signatures of local adaptation**

237 We first used BayeScan (Foll and Gaggiotti, 2008) to compare allele frequency differences  
238 among populations and identify  $F_{ST}$  outlier loci. Analysis was performed with 50,000 iterations  
239 thinned every 10, with 20 pilot runs, a burn-in of 50,000 iterations and other parameters at  
240 default. Whilst  $F_{ST}$  outliers are candidate loci of adaptation, they can also emerge because of  
241 selection due to deleterious alleles, hybrid zones and historical demography (Bierne et al.,  
242 2013). Thus, we use relaxed BayeScan parameters to screen outlier loci prior to GEA analysis  
243 in Bayenv2 (Günther and Coop, 2013).

244 Bayenv2 incorporates neutral genetic structure using a covariance matrix based on neutral  
245 markers and attempts to identify correlations between outliers and environmental gradients,  
246 potentially reducing false positives (De Mita et al., 2013). Based on recommendations in  
247 François *et al.* (2016), to further minimize false positives we initially excluded loci detected in  
248 BayeScan to compute a null covariance matrix of relatedness between populations, over  
249 100,000 iterations and five independent runs. We then tested all loci (including those initially

250 identified by BayeScan) under an alternative model where allele frequencies are determined by  
251 a combination of the covariance matrix and an environmental variable. We performed our  
252 analysis independently across all environmental variables, with the expectation that correlated  
253 predictors would return subsets of the same markers. The posterior probability that a locus is  
254 under selection, across each independent environmental variable was assessed using Bayes  
255 factors (BF), with  $\log_{10}$  posterior odds ratio values  $>1$  defined as strong support (Jeffery, 1961).  
256 We averaged BFs over independent runs as recommended by Blair et al. (2014), and following  
257 Günther & Coop (2013) we retained loci as good candidates if, in addition to a high BF, they also  
258 fell in the top 10% of Spearman correlation coefficient values, to further reduce false positives.  
259 For comparison, we also independently tested for signatures of local adaptation using  
260 Redundancy Analysis (RDA) (Forester et al., 2018; Rellstab et al., 2015), (see Supplementary  
261 Materials) though we consider only the candidates identified using Bayenv2 in subsequent  
262 analyses.

### 263 **Gene expression**

264 To provide an additional line of evidence on the activity of our candidate adaptive loci, we  
265 extracted up to 10,000bp flanking each side of the candidate locus from the *B. nana* reference  
266 genome and searched for these sequences in an RNA expression database using dwarf birch  
267 tissues derived from our genome reference plant under glasshouse conditions (Wang et al.,  
268 2013). Briefly, RNA was extracted from fresh dwarf birch leaves and flowers using a modified  
269 RNAeasy Plant Mini Kit (Qiagen, Hilden, Germany), incorporating additional CTAB and phenol-  
270 chloroform steps to generate 100bp paired-end reads with an average insert size of 280bp (for  
271 full methods see Zohren, 2016). These were mapped to the reference genome using Trinity  
272 software (Grabherr et al., 2013).

### 273 **Maladaptation under present and future conditions**

274 We carried out RONA analysis on the nine standardized environmental variables that were  
275 associated with six or more candidate loci, allocating each locus to the single environmental  
276 variable with the largest Bayes factor (thereby avoiding double-counting a locus in the c/f-  
277 RONA calculations below). We estimated the vector of effect sizes,  $\beta$ , in which each row  
278 corresponds to a locus, using R package rrBLUP (Endelman 2011). In this analysis, the vector  
279 of allele frequencies  $f$  for each population was used as the predictor of the environment in that  
280 location. The sum of  $f\beta$  gives an estimate of the environment (the value of the environmental  
281 variable) to which the population would be best adapted. The residual deviation of the  
282 observed value from this expectation is a measure of the deviation from the optimum  
283 environment for that population (c-RONA), and is proportional to the change in allele frequency  
284 that would be required to match the population to its local environment (weighted by  $\beta$ ). This  
285 measure is therefore analogous to those employed by Rellstab *et al.* (2016) and Pina-Martins *et*  
286 *al.* (2018), which quantify the mismatch between genotypes and environment in terms of allele  
287 frequencies. We combined information across variables by calculating the mean of the absolute  
288 residuals. Similarly, we could calculate the difference from the projected values of the  
289 environmental values under each climate change scenario to estimate f-RONA (Figure 2).

## 290 **Conservation prioritization**

291 We compared the magnitude of c-RONA across dwarf birch populations with the Shapley index  
292 (Haake *et al.*, 2007). The Shapley index prioritizes populations based on evolutionary isolation  
293 and contribution to overall diversity based on pairwise differentiation. Several similar metrics  
294 are widely used for conservation management (Collen *et al.*, 2011; Gumbs *et al.*, 2018; Jetz *et*  
295 *al.*, 2014). Here, we used the method outlined in Volkmann *et al.* (2014), which maximizes  
296 within-species genetic diversity using a network approach implemented in NeighborNet  
297 (Bryant and Moulton, 2004; Huson and Bryant, 2006). We used linear regression to test for a  
298 relationship between absolute c-RONA values and the Shapley index for neutral and adaptive  
299 loci.

## 300 **Simulated assisted gene flow**

301 For each environmental variable, and for each population in the study, we identified the  
302 population most appropriate for AGF based on the match between the local environment and  
303 the sum of  $f\beta$ . Where several suitable populations were identified within the confidence interval  
304 of our regression, we selected the location geographically closest to the recipient population,  
305 since there could be local adaptation to undetected environmental variables (cf. Boshier *et al.*  
306 2015).

## 307 **Method validation and ENM-GEA comparison**

308 To validate our model we tested the hypothesis that higher c-RONA values would be associated  
309 with the reduced performance of fitness proxies. Therefore we tested for a correlation between  
310 population c-RONA values for each environmental variable or their interactions and the  
311 response of i) square root transformed catkin counts and ii) germination rate across study  
312 populations. Finally, we tested for a correlation between the relative importance of  
313 environmental variables identified in our ENM and the number of GEA loci associated with each  
314 variable.

## 315 **Results**

### 316 **Environmental niche models**

317 The dwarf birch ENM was well parameterized with high mean test AUC ( $0.946 \pm 0.008$ ) and a  
318 low mean test omission rate (0.09,  $p < 0.001$ ) at a logistic threshold of occurrence of 0.193. Four  
319 variables together contributed >85% to the predictive model performance including annual  
320 mean temperature (34.9%) and maximum temperature of the warmest month (22.1%) (Table  
321 1). The resulting model is highly concordant with qualitative field observations and inspection  
322 of variable curves showed biologically plausible responses (Figure S3). Future projections show  
323 significant declines across the species' range with persistent populations restricted to areas of

324 higher elevation (Figures 1, S4). Excluding other anthropogenic pressures, under the most  
325 severe scenario (RCP8.5, 2081-2100), suitable habitat may be reduced to ~1% of the current  
326 extent (Table S2).

### 327 **Phenotypic data and habitat suitability**

328 Phenotypic data means are reported in Table S3. Germination success was assayed in 190  
329 individuals, and averaged 7.6% for both years with 6.1% 100-day survival (i.e. 80% of those  
330 that germinated) with substantial variation among populations (Table S4). A single large outlier  
331 individual (Emblehope) produced an exceptionally large number of catkins strongly biasing  
332 results, thus was excluded from subsequent analysis. Present time habitat suitability index  
333 (HSI) estimates for dwarf birch ranged from 0.0006 to 0.81 (Table 2), with substantial declines  
334 under all future scenarios (Figure S4). We found a significant non-linear positive relationship  
335 between HSI and mean population catkin count ( $F_{1,26}=7.50$ ,  $P=0.011$ ) as well as HSI and the  
336 proportion of seeds that germinated ( $F_{1,16}=9.52$ ,  $P=0.007$ ) (Figure 1).

### 337 **RAD Sequencing and genotype-environment associations**

338 After quality control, RAD sequencing produced 173,460,998 reads, of which 79.1% aligned to  
339 the *B. nana* genome. Subsequently 73.2% of aligned reads mapped to a single unique position.  
340 Three samples were excluded due to low coverage. After filtering we retained 14,889 SNPs over  
341 8,727 contigs. These contigs together cover approximately a third of the dwarf birch genome  
342 assembly. Bayescan identified 382 putative outlier SNPs with a relaxed false discovery rate of  
343 0.2 which were excluded during the generation of the Bayenv2 null covariance matrix.  
344 Subsequent GEA analysis detected 267 highly significant locus-environment associations,  
345 encompassing 303 SNPs (Table S5), with a single SNP from each locus retained for subsequent  
346 analysis. The most frequent associations were between mean diurnal range and 71 loci, and  
347 annual mean temperature and 64 loci, whereas variables such as temperature seasonality and  
348 mean temperature of driest or wettest quarters had comparatively few associated loci. Just six

349 loci were in common between Bayescan and Bayenv2 detection methods, and Bayescan  
350 candidate loci did not report significantly higher BF scores compared to the dataset as a whole.  
351 A comparison between bayenv2 and RDA found highly significant correlation ( $R_2 = 0.71$ ,  $F_{1,6} =$   
352  $14.76$ ,  $p = 0.008$ ) between methods, in the number of genotype-environment associations  
353 identified for each environmental variable (Table S6, Figure S5) suggesting that both methods  
354 are identifying a similar genomic pattern of adaptation.

### 355 **Expression of putative adaptive loci**

356 The 267 loci mapped to 185 unique scaffolds in our reference genome. Based on RNAseq data,  
357 35 candidate regions showed evidence of gene expression in flower tissue (19%), 15 showed  
358 gene expression in leaf tissue (8%) and 13 showed gene expression in both (7%). In comparison  
359 to the overall SNP dataset, we found that both flower ( $X^2=23.14$ ,  $p<0.001$ ) and leaf ( $X^2=8.59$ ,  
360  $p=0.003$ ) expressed sequences are significantly over-represented among putatively adaptive  
361 loci.

### 362 **Potential for adaptation and conservation prioritization**

363 The c-RONA based on environmentally associated SNPs under present climate varied from 0.07  
364 ( $SE \pm 0.06$ ) at Glen Cannich, to 0.39 ( $\pm 0.24$ ) at Beinn Enaiglair on the Western periphery of the  
365 species range (Table 2, S7). BLUP estimates for all variables are presented in Figure S6. Under  
366 future climate scenarios mean population f-RONA was greater than c-RONA increasing from  
367 0.22 ( $\pm 0.10$ ) to a maximum of 0.27 ( $\pm 0.11$ ) under scenario RCP8.5 (Table S8), with substantial  
368 variation across populations and projections. We found positive correlation between c-RONA  
369 and the Shapley Index for neutral genetic diversity ( $R_2=0.2$ ,  $F_{1,24}=5.895$ ,  $p=0.023$ ), despite a  
370 number of outliers as shown by the low correlation coefficient, but no such pattern for putative  
371 adaptive genetic diversity ( $R_2=0.00$ ,  $F_{1,24}=0.003$ ,  $p=0.983$ ) (Figure 3). The Shapley Index for  
372 neutral diversity also strongly favoured a small number of relict and range edge populations  
373 dominated by drift (e.g. BG, SA, see Borrell et al., 2018) whereas for adaptive diversity, the range

374 of values was narrower suggested more even support across populations. Therefore, the  
375 Shapley Index and our metric for maladaptation (c-RONA) provide very different ranking for  
376 conservation value (Table 2). A consensus ranking of populations is provided in Table S9.

### 377 **Simulating assisted gene flow**

378 For each population across each environmental variable we identified the geographically  
379 closest 'donor' population with an allele frequency that would reduce c-RONA (within  
380 confidence limits) at the 'recipient' site (Figure 4, S7). This strategy proposes a pattern of  
381 dispersal from the centre of the distribution towards the periphery, particularly at the Southern  
382 range edge, though there are exceptions such as transfer from the Northern to Southern range  
383 edge (e.g. MTColdQ, Figure S7). In some cases, the analysis does not indicate the need for AGF  
384 in particular populations, such as those at the centre of the species distribution which appear  
385 to be well matched to their environment (i.e. locally adapted).

### 386 **Method validation and ENM-GEA comparison**

387 If c-RONA values do indeed quantify the degree of maladaptation, they should be negatively  
388 correlated with independent measurements of population fitness. The c-RONA values for  
389 annual mean temperature (AMTemp) were significantly negatively correlated with mean  
390 population catkin counts ( $F_{1,23}=5.84$ ,  $p=0.025$ ) (Figure 5A) (we found a similar relationship for  
391 c-RONA averaged across all environmental variables, data not shown). The interaction of c-  
392 RONA for Annual Mean Temperature and Mean Diurnal Range correlated with germination rate  
393 ( $F_{11,14}=8.07$ ,  $p=0.004$ ). Finally, in a comparison of ENM and GEA methods, we found a significant  
394 correlation between the number of genotype-environment associations and the percentage  
395 contribution of environmental variables defining species range in our ENM ( $F_{1,8} = 7.28$ ,  $p =$   
396  $0.027$ ) (Figure 5B).

### 397 **Discussion**



398 Environmental niche modelling projects that the decline of dwarf birch across the UK is likely  
399 to continue and become increasingly severe, with almost total range loss possible by the end of  
400 the century under the highest emission scenarios. We found that catkin production and seed  
401 germination are positively correlated with ENM projections of habitat suitability. This suggests  
402 lower reproductive fitness of plants in populations with lower habitat suitability index. We  
403 cannot fully exclude the possibility that low seed germination rates are partly due to high  
404 dormancy, but it is not obvious that dormancy would increase fitness unless it was a bet-  
405 hedging strategy for a plant in a poor environment. Temperature was particularly important to  
406 our ENM projections, and previous work has shown reduced production of germinable seeds  
407 by dwarf birch in warmer climates (Alsos *et al.* 2003). In future, an overall decline in habitat  
408 suitability across the species' British range is likely to further reduce reproductive fitness and  
409 subsequent population persistence.

410 Genome-wide analysis identified 267 significant genotype-environment associations (0.018 of  
411 loci surveyed) across 24 environmental variables, which is consistent with the number of  
412 associations identified in similar studies (Abebe *et al.* 2015; Manthey and Moyle 2015; reviewed  
413 in Ahrens *et al.* 2018). These loci were significantly more commonly found within 10kb of a  
414 gene annotated on our reference genome sequence with cDNA evidence for expression than  
415 were SNP loci that were not identified as candidates, increasing our confidence that candidate  
416 loci could be involved in phenotypic traits.

417 We observe that of the four environmental variables that contribute substantially to the dwarf  
418 birch ENM (Table 1) three of these also account for the largest number of associated loci in the  
419 genotype-environment analysis (GEA) (Table 1, Table S5). Therefore, in a comparison of the  
420 two methods, we find significant agreement between ENM and GEA results in identifying  
421 important environmental variables (Figure 5B). It is not a logical necessity for environmental  
422 variables with the largest effects on species range limits to show the strongest correlation with  
423 allele frequencies. However, it is an interesting finding that suggests that we have identified

424 biologically relevant environmental variables that influence both distribution and local  
425 adaptation of dwarf birch. It would be valuable to test for this pattern in other species, in the  
426 context of genetic models of species range limits (Polechová, 2018; Polechová and Barton,  
427 2015).

428 We surveyed the allele frequencies of these GEA loci across populations to estimate c-RONA. As  
429 expected, we find the populations which we have identified as having a poor match between  
430 genotype and environment (high c-RONA) are particularly small or isolated, and those on the  
431 margins of the species' niche. This result is consistent with reconstruction of demographic  
432 history and genetic differentiation by Borrell *et al.* (2018), who inferred that several of these  
433 small and isolated populations have been subject to severe genetic drift. We also found some  
434 of our c-RONA estimates or their interaction to correlate with catkin production and seed  
435 germination rates. This suggests low fitness due to maladaptation. We cannot exclude the  
436 possibility that reduced reproductive success could be an adaptive response to a poorer  
437 environment, but given the short timescales involved this seems unlikely.

438 Based on our inference that that populations with low c-RONA are more locally adapted, we  
439 then performed a comparison between c-RONA and the Shapley Index based on neutral  
440 diversity. We find that populations with the highest inferred conservation value (highest  
441 Shapley score for neutral loci) were also those with the greatest deviation from optimum allele  
442 frequencies (highest c-RONA) (Table 2, Figure 3). This implies that it may be inappropriate to  
443 use the Shapley Index (and by extension, other similar metrics) based solely on neutral  
444 diversity for conservation prioritization, since this strategy would inadvertently favour poorly  
445 adapted populations that display a high degree of unique variation – in the case of dwarf birch,  
446 this is most likely due to genetic drift. Instead, we propose a conservation framework where  
447 populations with a low c-RONA and high Shapley Index based instead on adaptive diversity are  
448 prioritized. This would maximize both local adaptation and adaptive diversity, supporting  
449 future adaptive potential (Table S9).

450 To illustrate a possible application for this prioritization framework, we sought to identify  
451 putative dwarf birch donor populations that possess adaptive alleles at frequencies that would  
452 display reduced c-RONA in a recipient population (Figures 4, S6). We chose to demonstrate our  
453 approach using a current climate reference, as it could be considered more conservative,  
454 though we note that planning for future climate may have a better chance of long-term success.  
455 In this example, our hypothetical AGF strategy involves a substantial translocation of  
456 genotypes, particularly from the centre of the range towards the periphery. Whilst  
457 controversial, AGF may be advantageous, as it can introduce or increase the frequency of  
458 preadapted alleles to allow more rapid adaptation to track changing climate, alleviate  
459 inbreeding depression or increase adaptive potential (Frankham, 2015; Prober et al., 2015);  
460 and in the process provide a demographic safeguard by augmenting population size (Hodgins  
461 and Moore, 2016). In practice, implementation of AGF is likely to take the form of composite  
462 provenancing, whereby genetic material from a combination of source populations is used  
463 (Breed et al., 2013; Hodgins and Moore, 2016). This may seek to target adaptive diversity across  
464 multiple important environmental variables from across the species range, sometimes  
465 irrespective of the distance to the source population and the 'local is best' paradigm (Boshier et  
466 al., 2015; Havens et al., 2015; Jones, 2013).

467 Our suggested approach has some limitations: RADseq only identifies variation in a subset of  
468 the genome (Lowry et al., 2016) possibly missing important adaptive loci (Harrisson et al.,  
469 2014). This concern may be addressed in future by whole genome population sequencing, and  
470 a better understanding of the limiting returns from typing more adaptive loci (for example  
471 Ahrens *et al.* 2018). Second, our approach does not explicitly account for phenotypic plasticity  
472 (which can be adaptive or non-adaptive), or the adaptive input from new mutations (Chevin  
473 and Lande, 2011). More generally, we caution against interpreting the statistical association  
474 between the RADseq alleles and the bioclimatic variates (for example, MDR) as a demonstration  
475 that the allele in question is linked to a quantitative trait locus with adaptive variation. Rather,

476 the causal environmental variable may be unmeasured, but closely correlated with MDR.  
477 Finally, we highlight that, in our study area, the climate has been changing, albeit slowly, for  
478 several millennia, with the rate of climate change increasing more recently (Wang et al., 2014).  
479 Therefore, the clines identified here could represent adaptation to the environment of the  
480 recent past, rather than the present, and therefore may underestimate the current ecological  
481 risk. In the future, methods to accommodate change in the relative importance of  
482 environmental variables through time (Clark *et al.* 2014) and non-linear associations  
483 (Fitzpatrick and Keller 2015) are likely to advance our understanding and improve estimates  
484 of local adaptation in wild populations.

## 485 **Conclusions**

486 Estimating the degree of maladaptation in populations as a criterion to inform selection of plant  
487 material for genetic rescue, composite provenancing or species reintroductions is currently the  
488 subject of considerable interest (Gibson et al., 2016; Leroy et al., 2018), and this is likely to  
489 increase in the context of environmental change (Aitken and Bemmels, 2016). Here we present  
490 an approach to permit rapid assessment of local adaptation and future adaptive potential in  
491 wild populations. Importantly, the estimation of maladaptation presents a testable hypothesis;  
492 specifically, that if an AGF programme translocated individuals to a site where they are  
493 expected to display reduced c-RONA, the response of measurable fitness proxies such as catkin  
494 production should be positive. In dwarf birch, AGF would have to be combined with other  
495 management interventions focused on mitigating burning and grazing pressure to support  
496 natural regeneration, with the aim that larger populations eventually support 'natural' gene  
497 flow. Similarly, AGF need not entail translocation of genetic material to an existing recipient  
498 population in the first instance. Initially individuals of different provenance (and known allele  
499 frequencies) could be translocated to trial locations and subsequent fitness assessments would  
500 enable validation of the predicted adaptive potential. Conservationists and practitioners would  
501 then be in a better position to manage and, where appropriate, facilitate adaptation.

## 502 **Acknowledgements**

503 This work was funded by NERC Fellowship NE/G01504X/1 to Richard Buggs. James Borrell  
504 was funded by NERC CASE studentship NE/J017388/1 in collaboration with Trees for Life and  
505 Highland Birchwoods. Jasmin Zohren was funded by the Marie-Curie Initial Training Network  
506 INTERCROSSING. We gratefully acknowledge helpful comments from Dr. Chris Eizaguirre and  
507 the assistance provided by members of the Montane Scrub Action Group and numerous  
508 landowners who permitted access to their estates.

## 509 **Data Archiving Statement**

- 510 1. Illumina read data from RADseq libraries has been uploaded to the European  
511 Nucleotide Archive project PRJEB26807, sample accessions ERS2598190- ERS2598376
  
- 512 2. Species records are available directly from the NBN Gateway  
513 [<https://data.nbn.org.uk/>].
  
- 514 3. Climate data are available from <http://www.worldclim.org/>

515

516

517

518

519

520

521

522

523

524

525

## 526 Literature Cited

- 527 Abebe, T.D., Naz, A.A., Léon, J., 2015. Landscape genomics reveal signatures of local adaptation  
528 in barley (*Hordeum vulgare* L.). *Front. Plant Sci.* 6.  
529 <https://doi.org/10.3389/fpls.2015.00813>
- 530 Ahrens, C.W., Rymer, P.D., Stow, A., Bragg, J., Dillon, S., Umbers, K.D.L., Dudaniec, R.Y., 2018.  
531 The search for loci under selection: trends, biases and progress. *Mol. Ecol.* 27, 1342–  
532 1356. <https://doi.org/10.1111/mec.14549>
- 533 Aitken, S.N., Bemmels, J.B., 2016. Time to get moving: Assisted gene flow of forest trees. *Evol.*  
534 *Appl.* 9, 271–290. <https://doi.org/10.1111/eva.12293>
- 535 Aitken, S.N., Whitlock, M.C., 2013. Assisted Gene Flow to Facilitate Local Adaptation to Climate  
536 Change. *Annu. Rev. Ecol. Evol. Syst.* 44, 367–88. [https://doi.org/DOI 10.1146/annurev-ecolsys-110512-135747](https://doi.org/DOI%2010.1146/annurev-ecolsys-110512-135747)
- 537
- 538 Aitken, S.N., Yeaman, S., Holliday, J.A., Wang, T., Curtis-McLane, S., 2008. Adaptation, migration  
539 or extirpation: climate change outcomes for tree populations. *Evol. Appl.* 1, 95–111.  
540 <https://doi.org/10.1111/j.1752-4571.2007.00013.x>
- 541 Alberto, F.J., Aitken, S.N., Alía, R., González-Martínez, S.C., Hänninen, H., Kremer, A., Lefèvre, F.,  
542 Lenormand, T., Yeaman, S., Whetten, R., Savolainen, O., 2013. Potential for evolutionary  
543 responses to climate change - evidence from tree populations. *Glob. Chang. Biol.* 19,  
544 1645–1661. <https://doi.org/10.1111/gcb.12181>
- 545 Alsos, I.G., Spjelkavik, S., Engelskjøn, T., 2003. Seed bank size and composition of *Betula nana*,  
546 *Vaccinium uliginosum*, and *Campanula rotundifolia* habitats in Svalbard and northern  
547 Norway. *Can. J. Bot.* 81, 220–231. <https://doi.org/10.1139/b03-018>
- 548 Alsos, I.G., Spjelkavik, S., Engelskjøn, T., 2003. Seed bank size and composition of *Betula nana* ,  
549 *Vaccinium uliginosum* , and *Campanula rotundifolia* habitats in Svalbard and northern  
550 Norway. *Can. J. Bot.* 81, 220–231. <https://doi.org/10.1139/b03-018>
- 551 Aston, D., 1984. *Betula nana* L., a note on its status in the United Kingdom. *Proc. R. Soc.*  
552 *Edinburgh Sect. B Biol. Sci.* 85, 43–47.
- 553 Bay, R.A., Rose, N.H., Logan, C.A., Palumbi, S.R., 2017. Genomic models predict successful coral  
554 adaptation if future ocean warming rates are reduced. *Sci. Adv.* 3, e1701413.  
555 <https://doi.org/10.1126/sciadv.1701413>
- 556 Bellard, C., Bertelsmeier, C., Leadley, P., Thuiller, W., Courchamp, F., 2012. Impacts of Climate  
557 Change on the Future of Biodiversity. *Ecol. Lett.* 15, 365–377.  
558 <https://doi.org/10.1111/j.1461-0248.2011.01736.x>Impacts
- 559 Bierne, N., Roze, D., Welch, J.J., 2013. Pervasive selection or is it ...? why are F<sub>ST</sub> outliers

- 560 sometimes so frequent? *Mol. Ecol.* 33, 2061–2064. <https://doi.org/10.1111/mec.12241>
- 561 Blair, L.M., Granka, J.M., Feldman, M.W., 2014. On the stability of the Bayenv method in  
562 assessing human SNP-environment associations. *Hum. Genomics* 8, 1–13.  
563 <https://doi.org/10.1186/1479-7364-8-1>
- 564 Bonin, A., Nicole, F., Pompanon, F., Miaud, C., Taberlet, P., 2007. Population adaptive index: A  
565 new method to help measure intraspecific genetic diversity and prioritize populations  
566 for conservation. *Conserv. Biol.* 21, 697–708. <https://doi.org/10.1111/j.1523-1739.2007.00685.x>
- 568 Borrell, J.S., Wang, N., Nichols, R.A., Buggs, R.J.A., 2018. Genetic diversity maintained among  
569 fragmented populations of a tree undergoing range contraction. *Heredity (Edinb.)* 121,  
570 304–318. <https://doi.org/10.1038/s41437-018-0132-8>
- 571 Boshier, D., Broadhurst, L., Cornelius, J., Gallo, L., Koskela, J., Loo, J., Petrokofsky, G., St Clair, B.,  
572 2015. Is local best? Examining the evidence for local adaptation in trees and its scale.  
573 *Environ. Evid.* 4, 1–10. <https://doi.org/10.1186/s13750-015-0046-3>
- 574 Breed, M.F., Stead, M.G., Ottewell, K.M., Gardner, M.G., Lowe, A.J., 2013. Which provenance and  
575 where? Seed sourcing strategies for revegetation in a changing environment. *Conserv.*  
576 *Genet.* 14, 1–10. <https://doi.org/10.1007/s10592-012-0425-z>
- 577 Bryant, D., Moulton, V., 2004. Neighbor-Net: An Agglomerative Method for the Construction of  
578 Phylogenetic Networks. *Mol. Biol. Evol.* 21, 255–265.  
579 <https://doi.org/10.1093/molbev/msh018>
- 580 Catchen, J., Hohenlohe, P.A., Bassham, S., Amores, A., Cresko, W.A., 2013. Stacks: an analysis  
581 tool set for population genomics. *Mol. Ecol.* 22, 3124–3140.  
582 <https://doi.org/10.1111/mec.12354>
- 583 Chevin, L.M., Lande, R., 2011. Adaptation to marginal habitats by evolution of increased  
584 phenotypic plasticity. *J. Evol. Biol.* 24, 1462–1476. <https://doi.org/10.1111/j.1420-9101.2011.02279.x>
- 586 Clark, J.S., Gelfand, A.E., Woodall, C.W., Zhu, K., 2014. More than the sum of the parts: Forest  
587 climate response from joint species distribution models. *Ecol. Appl.* 24, 990–999.  
588 <https://doi.org/10.1890/13-1015.1>
- 589 Collen, B., Turvey, S.T., Waterman, C., Meredith, H.M.R., Kuhn, T.S., Baillie, J.E.M., Isaac, N.J.B.,  
590 2011. Investing in evolutionary history: implementing a phylogenetic approach for  
591 mammal conservation. *Philos. Trans. R. Soc. B Biol. Sci.* 366, 2611–2622.  
592 <https://doi.org/10.1098/rstb.2011.0109>
- 593 Coop, G., Witonsky, D., Rienzo, A. Di, Pritchard, J.K., 2010. Using Environmental Correlations to  
594 Identify Loci Underlying Local Adaptation 1423, 1411–1423.

- 595 <https://doi.org/10.1534/genetics.110.114819>
- 596 Corlett, R.T., Westcott, D.A., 2013. Will plant movements keep up with climate change? Trends  
597 Ecol. Evol. 28, 482–488. <https://doi.org/10.1016/j.tree.2013.04.003>
- 598 Davis, M.B., Shaw, R.G., Etterson, J.R., 2005. Evolutionary Responses to Changing Climate.  
599 Ecology 86, 1704–1714.
- 600 De Mita, S., Thuillet, A.C., Gay, L., Ahmadi, N., Manel, S., Ronfort, J., Vigouroux, Y., 2013.  
601 Detecting selection along environmental gradients: Analysis of eight methods and their  
602 effectiveness for outbreeding and selfing populations. Mol. Ecol. 22, 1383–1399.  
603 <https://doi.org/10.1111/mec.12182>
- 604 Eizaguirre, C., Baltazar-Soares, M., 2014. Evolutionary conservation-evaluating the adaptive  
605 potential of species. Evol. Appl. 7, 963–967. <https://doi.org/10.1111/eva.12227>
- 606 Elith, J., Leathwick, J., 2009. Species distribution models: ecological explanation and prediction  
607 across space and time. Annu. Rev. Ecol. Evol. ... 40, 677–697.  
608 <https://doi.org/10.1146/annurev.ecolsys.110308.120159>
- 609 Engler, R., Randin, C.F., Thuiller, W., Dullinger, S., Zimmermann, N.E., Araújo, M.B., Pearman,  
610 P.B., Le Lay, G., Piedallu, C., Albert, C.H., Choler, P., Coldea, G., De Lamo, X., Dirnböck, T.,  
611 Gégout, J.C., Gómez-García, D., Grytnes, J.A., Heegaard, E., Høistad, F., Nogués-Bravo, D.,  
612 Normand, S., Puşcaş, M., Sebastià, M.T., Stanisci, A., Theurillat, J.P., Trivedi, M.R., Vittoz, P.,  
613 Guisan, A., 2011. 21st century climate change threatens mountain flora unequally across  
614 Europe. Glob. Chang. Biol. 17, 2330–2341. [https://doi.org/10.1111/j.1365-  
615 2486.2010.02393.x](https://doi.org/10.1111/j.1365-2486.2010.02393.x)
- 616 Fitzpatrick, M.C., Keller, S.R., 2015. Ecological genomics meets community-level modelling of  
617 biodiversity: Mapping the genomic landscape of current and future environmental  
618 adaptation. Ecol. Lett. 18, 1–16. <https://doi.org/10.1111/ele.12376>
- 619 Flanagan, S.P., Forester, B.R., Latch, E.K., Aitken, S.N., Hoban, S., 2018. Guidelines for planning  
620 genomic assessment and monitoring of locally adaptive variation to inform species  
621 conservation. Evol. Appl. 11, 1035–1052. <https://doi.org/10.1111/eva.12569>
- 622 Foll, M., Gaggiotti, O., 2008. A genome-scan method to identify selected loci appropriate for  
623 both dominant and codominant markers: A Bayesian perspective. Genetics 180, 977–  
624 993. <https://doi.org/10.1534/genetics.108.092221>
- 625 Forester, B.R., Lasky, J.R., Wagner, H.H., Urban, D.L., 2018. Comparing methods for detecting  
626 multilocus adaptation with multivariate genotype–environment associations. Mol. Ecol.  
627 27, 2215–2233. <https://doi.org/10.1111/mec.14584>
- 628 François, O., Martins, H., Caye, K., Schoville, S.D., 2016. Controlling false discoveries in genome  
629 scans for selection. Mol. Ecol. 25, 454–469. <https://doi.org/10.1111/mec.13513>



- 630 Frankham, R., 2015. Genetic rescue of small inbred populations: meta-analysis reveals large  
631 and consistent benefits of gene flow. *Mol. Ecol.* 24, 2610–2618.  
632 <https://doi.org/10.1111/mec.13139>
- 633 Frankham, R., Ballou, J.D., Eldridge, M.D.B., Lacy, R.C., Ralls, K., Dudash, M.R., Fenster, C.B.,  
634 2011. Predicting the Probability of Outbreeding Depression. *Conserv. Biol.* 25, 465–475.  
635 <https://doi.org/10.1111/j.1523-1739.2011.01662.x>
- 636 Funk, W.C., Forester, B.R., Converse, S.J., Darst, C., Morey, S., 2019. Improving conservation  
637 policy with genomics: a guide to integrating adaptive potential into U . S . Endangered  
638 Species Act decisions for conservation practitioners and geneticists. *Conserv. Genet.* 20,  
639 115–134. <https://doi.org/10.1007/s10592-018-1096-1>
- 640 Gent, P.R., Danabasoglu, G., Donner, L.J., Holland, M.M., Hunke, E.C., Jayne, S.R., Lawrence, D.M.,  
641 Neale, R.B., Rasch, P.J., Vertenstein, M., Worley, P.H., Yang, Z.L., Zhang, M., 2011. The  
642 community climate system model version 4. *J. Clim.* 24, 4973–4991.  
643 <https://doi.org/10.1175/2011JCLI4083.1>
- 644 Gibson, A.L., Espeland, E.K., Wagner, V., Nelson, C.R., 2016. Can local adaptation research in  
645 plants inform selection of native plant materials? An analysis of experimental  
646 methodologies. *Evol. Appl.* 9, 1219–1228. <https://doi.org/10.1111/eva.12379>
- 647 Grabherr, M.G., Haas, B.J., Yassour, M., Levin, J.Z., A, T.D., I, A., X, A., L, F., R, R., Q, Z., Z, C., E, M.,  
648 N, H., Gnirke, A., Rhind, N., Palma, F. di, W., B., Friedman, N., Regev, A., 2013. Trinity:  
649 reconstructing a full-length transcriptome without a genome from RNA-Seq data. *Nat.*  
650 *Biotechnol.* 29, 644–652. <https://doi.org/10.1038/nbt.1883>.Trinity
- 651 Gratani, L., 2014. Plant Phenotypic Plasticity in Response to Environmental Factors. *Adv. Bot.*  
652 2014, 1–17. <https://doi.org/10.1155/2014/208747>
- 653 Gumbs, R., Gray, C.L., Wearn, O.R., Owen, N.R., 2018. Tetrapods on the EDGE: Overcoming data  
654 limitations to identify phylogenetic conservation priorities. *PLoS One* 13, 1–19.  
655 <https://doi.org/10.1371/journal.pone.0194680>
- 656 Günther, T., Coop, G., 2013. Robust identification of local adaptation from allele frequencies.  
657 *Genetics* 195, 205–220. <https://doi.org/10.1534/genetics.113.152462>
- 658 Haake, C.-J., Kashiwada, A., Su, F.E., 2007. The Shapley value of phylogenetic trees. *J. Math. Biol.*  
659 56, 479–497. <https://doi.org/10.1007/s00285-007-0126-2>
- 660 Hällfors, M.H., Liao, J., Dzurisin, J.D.K., Grundel, R., Hyvärinen, M., Towle, K., Wu, G.C., Hellmann,  
661 J.J., 2015. Addressing potential local adaptation in species distribution models:  
662 implications for conservation under climate change. *Ecol. Appl.* 15–0926.1.  
663 <https://doi.org/10.1890/15-0926.1>
- 664 Hampe, A., Petit, R.J., 2005. Conserving biodiversity under climate change: The rear edge

- 665 matters. *Ecol. Lett.* 8, 461–467. <https://doi.org/10.1111/j.1461-0248.2005.00739.x>
- 666 Harrison, K.A., Pavlova, A., Telonis-Scott, M., Sunnucks, P., 2014. Using genomics to  
667 characterize evolutionary potential for conservation of wild populations. *Evol. Appl.* 7,  
668 1008–1025. <https://doi.org/10.1111/eva.12149>
- 669 Havens, K., Vitt, P., Still, S., Kramer, A.T., Fant, J.B., Schatz, K., 2015. Seed Sourcing for  
670 Restoration in an Era of Climate Change. *Nat. Areas J.* 35, 122–133.  
671 <https://doi.org/10.3375/043.035.0116>
- 672 Hijmans, R.J., Cameron, S.E., Parra, J.L., Jones, P.G., Jarvis, A., 2005. Very high resolution  
673 interpolated climate surfaces for global land areas. *Int. J. Climatol.* 25, 1965–1978.  
674 <https://doi.org/10.1002/joc.1276>
- 675 Hijmans, R.J., Etten, J., 2012. raster: Geographic analysis and modeling with raster data.
- 676 Hijmans, R.J., Philips, S., Leathwick, J., Elith, J., 2011. Package “dismo.”
- 677 Hodgins, K.A., Moore, J.L., 2016. Adapting to a warming world: Ecological restoration, climate  
678 change, and genomics. *Am. J. Bot.* 103, 590–592. <https://doi.org/10.3732/ajb.1600049>
- 679 Hoersch, B., Braun, G., Schmidt, U., 2002. Relation between landform and vegetation in alpine  
680 regions of Wallis, Switzerland. A multiscale remote sensing and GIS approach. *Comput.*  
681 *Environ. Urban Syst.* 26, 113–139. [https://doi.org/10.1016/S0198-9715\(01\)00039-4](https://doi.org/10.1016/S0198-9715(01)00039-4)
- 682 Hoffmann, A.A., Sgrò, C.M., Kristensen, T.N., 2017. Revisiting Adaptive Potential, Population  
683 Size, and Conservation. *Trends Ecol. Evol.* 32, 506–517.  
684 <https://doi.org/10.1016/j.tree.2017.03.012>
- 685 Huson, D.H., Bryant, D., 2006. Application of phylogenetic networks in evolutionary studies.  
686 *Mol. Biol. Evol.* 23, 254–267. <https://doi.org/10.1093/molbev/msj030>
- 687 IPCC, 2014a. Climate Change 2014: Synthesis Report. Contribution of Working Groups I, II and  
688 III to the Fifth Assessment Report of the Intergovernmental Panel on Climate Change  
689 [Core Writing Team, R.K. Pachauri and L.A. Meyer (eds.)].
- 690 IPCC, 2014b. Climate Change 2014 Synthesis Report Summary Chapter for Policymakers. *Ippc*  
691 31. <https://doi.org/10.1017/CBO9781107415324>
- 692 Isaac, N.J.B., Turvey, S.T., Collen, B., Waterman, C., Baillie, J.E.M., 2007. Mammals on the EDGE:  
693 Conservation priorities based on threat and phylogeny. *PLoS One* 2.  
694 <https://doi.org/10.1371/journal.pone.0000296>
- 695 Jeffery, H., 1961. *The Theory of Probability*, 6th ed., 3rd. ed. ed, Oxford University Press,  
696 Oxford. *Classic Texts in the Physical Sciences*. Oxford Univ. Press, Oxford.

- 697 Jetz, W., Thomas, G.H., Joy, J.B., Redding, D.W., Hartmann, K., Mooers, A.O., 2014. Global  
698 Distribution and Conservation of Evolutionary Distinctness in Birds. *Curr. Biol.* 24, 919–  
699 930. <https://doi.org/10.1016/j.cub.2014.03.011>
- 700 Jin, Y.K., Lundgren, P., Lutz, A., Raina, J.-B., Howells, E.J., Paley, A.S., Willis, B.L., van Oppen,  
701 M.J.H., 2016. Genetic markers for antioxidant capacity in a reef-building coral. *Sci. Adv.* 2,  
702 e1500842–e1500842. <https://doi.org/10.1126/sciadv.1500842>
- 703 Jones, T.A., 2013. When local isn't best. *Evol. Appl.* 6, 1109–1118.  
704 <https://doi.org/10.1111/eva.12090>
- 705 Kardos, M., Shafer, A.B.A., 2018. The Peril of Gene-Targeted Conservation. *Trends Ecol. Evol.*  
706 33, 827–839. <https://doi.org/10.1016/j.tree.2018.08.011>
- 707 Kawecki, T.J., Ebert, D., 2004. Conceptual issues in local adaptation. *Ecol. Lett.* 7, 1225–1241.  
708 <https://doi.org/10.1111/j.1461-0248.2004.00684.x>
- 709 Keller, S.R., Levensen, N., Olson, M.S., Tiffin, P., 2012. Local adaptation in the flowering-time gene  
710 network of balsam poplar, *populus balsamifera* L. *Mol. Biol. Evol.* 29, 3143–3152.  
711 <https://doi.org/10.1093/molbev/mss121>
- 712 Koskela, J., Lefèvre, F., Schueler, S., Kraigher, H., Olrik, D.C., Hubert, J., Longauer, R., Bozzano,  
713 M., Yrjänä, L., Alizoti, P., Rotach, P., Vietto, L., Bordács, S., Myking, T., Eysteinnsson, T.,  
714 Souvannavong, O., Fady, B., De Cuyper, B., Heinze, B., von Wühlisch, G., Ducouso, A.,  
715 Ditlevsen, B., 2013. Translating conservation genetics into management: Pan-European  
716 minimum requirements for dynamic conservation units of forest tree genetic diversity.  
717 *Biol. Conserv.* <https://doi.org/10.1016/j.biocon.2012.07.023>
- 718 Langmead, B., Salzberg, S.L., 2012. Fast gapped-read alignment with Bowtie 2. *Nat Meth* 9,  
719 357–359.
- 720 Legendre, P., Legendre, L., 2012. *Numerical Ecology*, 3rd editio. ed. Elsevier, Amsterdam.
- 721 Leimu, R., Fischer, M., 2008. A meta-analysis of local adaptation in plants. *PLoS One* 3, 1–8.  
722 <https://doi.org/10.1371/journal.pone.0004010>
- 723 Leroy, G., Carroll, E.L., Bruford, M.W., DeWoody, J.A., Strand, A., Waits, L., Wang, J., 2018. Next-  
724 generation metrics for monitoring genetic erosion within populations of conservation  
725 concern. *Evol. Appl.* 11, 1066–1083. <https://doi.org/10.1111/eva.12564>
- 726 Liu, C., Newell, G., White, M., 2016. On the selection of thresholds for predicting species  
727 occurrence with presence-only data. *Ecol. Evol.* 6, 337–348.  
728 <https://doi.org/10.1002/ece3.1878>
- 729 Loarie, S.R., Duffy, P.B., Hamilton, H., Asner, G.P., Field, C.B., Ackerly, D.D., 2009. The velocity of  
730 climate change. *Nature* 462, 1052–1055. <https://doi.org/10.1038/nature08649>

- 731 Lowry, D.B., Hoban, S., Kelley, J.L., Lotterhos, K.E., Reed, L.K., Antolin, M.F., Storfer, A., 2016.  
732 Breaking RAD: an evaluation of the utility of restriction site-associated DNA sequencing  
733 for genome scans of adaptation. *Mol. Ecol. Resour.* 17, 142–152.  
734 <https://doi.org/10.1111/1755-0998.12635>
- 735 Maguire, K.C., Nieto-Lugilde, D., Fitzpatrick, M.C., Williams, J.W., Blois, J.L., 2015. Modeling  
736 Species and Community Responses to Past, Present, and Future Episodes of Climatic and  
737 Ecological Change. *Annu. Rev. Ecol. Evol. Syst.* 46, 343–368.
- 738 Manthey, J.D., Moyle, R.G., 2015. Isolation by environment in white-breasted nuthatches (*Sitta*  
739 *carolinensis*) of the Madrean Archipelago sky islands: A landscape genomics approach.  
740 *Mol. Ecol.* 24, 3628–3638. <https://doi.org/10.1111/mec.13258>
- 741 McKenney, D., Pedlar, J., Lawrance, K., Campbell, K., Hutchinson, M., 2007. Potential impacts of  
742 climate change on the distribution of North American trees. *Bioscience* 57, 939–948.  
743 <https://doi.org/10.1641/b571106>
- 744 Meier, E.S., Lischke, H., Schmatz, D.R., Zimmermann, N.E., 2012. Climate, competition and  
745 connectivity affect future migration and ranges of European trees. *Glob. Ecol. Biogeogr.*  
746 21, 164–178. <https://doi.org/10.1111/j.1466-8238.2011.00669.x>
- 747 Nadeau, S., Meirmans, P.G., Aitken, S.N., Ritland, K., Isabel, N., 2016. The challenge of  
748 separating signatures of local adaptation from those of isolation by distance and  
749 colonization history: The case of two white pines. *Ecol. Evol.* 6, 8649–8664.  
750 <https://doi.org/10.1002/ece3.2550>
- 751 Nicotra, A.B., Atkin, O.K., Bonser, S.P., Davidson, A.M., Finnegan, E.J., Mathesius, U., Poot, P.,  
752 Purugganan, M.D., Richards, C.L., Valladares, F., van Kleunen, M., 2010. Plant phenotypic  
753 plasticity in a changing climate. *Trends Plant Sci.* 15, 684–692.  
754 <https://doi.org/10.1016/j.tplants.2010.09.008>
- 755 Oksanen, J., Blanchet, F.G., Kindt, R., Legendre, P., Minchin, P.R., O'Hara, R.B., Simpson, G.L.,  
756 Solymos, P., Stevens, M.H.M., Wagner, H., 2019. Package “vegan”: Community ecology  
757 package.
- 758 Olson, M.S., Levens, N., Soolanayakanahally, R.Y., Guy, R.D., Schroeder, W.R., Keller, S.R., Tiffin,  
759 P., 2013. The adaptive potential of *Populus balsamifera* L. to phenology requirements in  
760 a warmer global climate. *Mol. Ecol.* 22, 1214–1230. <https://doi.org/10.1111/mec.12067>
- 761 Pardo-Diaz, C., Salazar, C., Jiggins, C.D., 2015. Towards the identification of the loci of adaptive  
762 evolution. *Methods Ecol. Evol.* 6, 445–464. <https://doi.org/10.1111/2041-210X.12324>
- 763 Parolo, G., Rossi, G., Ferrarini, A., 2008. Assessing ecological responses to environmental  
764 change using statistical models. *J. Appl. Ecol.* 45, 1410–1418.  
765 <https://doi.org/10.1111/j.1365-2664.2007.0>

- 766 Pavlova, A., Beheregaray, L.B., Coleman, R., Gilligan, D., Harrisson, K.A., Ingram, B.A., Kearns, J.,  
767 Lamb, A.M., Lintermans, M., Lyon, J., Nguyen, T.T.T., Sasaki, M., Tonkin, Z., Yen, J.D.L.,  
768 Sunnucks, P., 2017. Severe consequences of habitat fragmentation on genetic diversity of  
769 an endangered Australian freshwater fish: A call for assisted gene flow. *Evol. Appl.* 10,  
770 531–550. <https://doi.org/10.1111/eva.12484>
- 771 Phillips, S.J., Anderson, R.P., Schapire, R.E., 2006. Maximum entropy modeling of species  
772 geographic distributions. *Ecol. Modell.* 190, 231–259.  
773 <https://doi.org/10.1016/j.ecolmodel.2005.03.026>
- 774 Pina-Martins, F., Baptista, J., Pappas Jr G. & Paulo, O.S., 2018. New insights on adaptation and  
775 population structure of cork oak using genotyping by sequencing 0–3.  
776 <https://doi.org/10.1101/263160>
- 777 Polechová, J., 2018. Is the sky the limit? On the expansion threshold of a species' range. *PLoS*  
778 *Biol.* 16, 1–18. <https://doi.org/10.1371/journal.pbio.2005372>
- 779 Polechová, J., Barton, N.H., 2015. Limits to adaptation along environmental gradients. *Proc.*  
780 *Natl. Acad. Sci.* 112, 6401–6406. <https://doi.org/10.1073/pnas.1421515112>
- 781 Prober, S.M., Byrne, M., McLean, E.H., Steane, D.A., Potts, B.M., Vaillancourt, R.E., Stock, W.D.,  
782 2015. Climate-adjusted provenancing: a strategy for climate-resilient ecological  
783 restoration. *Front. Ecol. Evol.* 3, 1–5. <https://doi.org/10.3389/fevo.2015.00065>
- 784 R Development Core Team, 2014. R: A language and environment for statistical computing.  
785 Found. Stat. Comput. Vienna, Austria.
- 786 Razgour, O., Forester, B., Taggart, J.B., Bekaert, M., Juste, J., Ibáñez, C., 2019. Considering  
787 adaptive genetic variation in climate change vulnerability assessment reduces species  
788 range loss projections 116, 6–11. <https://doi.org/10.1073/pnas.1820663116>
- 789 Reed, D.H., Frankham, R., 2003. Correlation between Fitness and Genetic  
790 Diversity\rCorrelación entre Adaptabilidad y Diversidad Genética. *Conserv. Biol.* 17,  
791 230–237. <https://doi.org/10.1046/j.1523-1739.2003.01236.x>
- 792 Rellstab, C., Gugerli, F., Eckert, A.J., Hancock, A.M., Holderegger, R., 2015. A practical guide to  
793 environmental association analysis in landscape genomics. *Mol. Ecol.* 24, 4348–4370.  
794 <https://doi.org/10.1111/mec.13322>
- 795 Rellstab, C., Zoller, S., Walthert, L., Lesur, I., Pluess, A.R., Graf, R.R., Bodénès, C., Sperisen, C.,  
796 Kremer, A., Gugerli, F., Bodini, C., Sperisen, C., Kremer, A., Gugerli, F., 2016.  
797 Signatures of local adaptation in candidate genes of oaks (*Quercus* spp.) with respect to  
798 present and future climatic conditions. *Mol. Ecol.* 25, 5907–5924.  
799 <https://doi.org/10.1111/mec.13889>
- 800 Schweizer, R.M., Vonholdt, B.M., Harrigan, R., Wayne, R.K., 2016. Genetic subdivision and

- 801 candidate genes under selection in North American grey wolves 380–402.  
802 <https://doi.org/10.1111/mec.13364>
- 803 Searcy, C.A., Shaffer, H.B., 2016. Do Ecological Niche Models Accurately Identify Climatic  
804 Determinants of Species Ranges? *Am. Nat.* 187:4, 423–435.
- 805 Urban, M.C., 2015. Accelerating extinction risk from climate change. *Science* (80-. ). 348.
- 806 Volkmann, L., Martyn, I., Moulton, V., Spillner, A., Mooers, A.O., 2014. Prioritizing populations  
807 for conservation using phylogenetic networks. *PLoS One* 9.  
808 <https://doi.org/10.1371/journal.pone.0088945>
- 809 Wang, N., Borrell, J.S., Bodles, W.J. a, Kuttapitiya, A., Nichols, R. a., Buggs, R.J. a, 2014. Molecular  
810 footprints of the Holocene retreat of dwarf birch in Britain. *Mol. Ecol.* 23, 2771–2782.  
811 <https://doi.org/10.1111/mec.12768>
- 812 Wang, N., Thomson, M., Bodles, W.J.A. a, Crawford, R.M.M.M., Hunt, H. V., Featherstone, A.W.,  
813 Pellicer, J., Buggs, R.J.A. a, 2013. Genome sequence of dwarf birch (*Betula nana*) and  
814 cross-species RAD markers. *Mol. Ecol.* 22, 3098–3111.  
815 <https://doi.org/10.1111/mec.12131>
- 816 Wang, T., Wang, Z., Xia, F., Su, Y., 2016. Local adaptation to temperature and precipitation in  
817 naturally fragmented populations of *Cephalotaxus oliveri*, an endangered conifer  
818 endemic to China. *Sci. Rep.* 6, 1–12. <https://doi.org/10.1038/srep25031>
- 819 Weeks, A.R., Stoklosa, J., Hoffmann, A.A., 2016. Conservation of genetic uniqueness of  
820 populations may increase extinction likelihood of endangered species: The case of  
821 Australian mammals. *Front. Zool.* 13, 1–9. <https://doi.org/10.1186/s12983-016-0163-z>
- 822 Williams, S.E., Moritz, C., Shoo, L.P., Isaac, J.L., Hoffmann, A. a, Langham, G., 2008. Towards an  
823 Integrated Framework for Assessing the Vulnerability of Species to Climate Change. *PLoS*  
824 *Biol* 6, e325. <https://doi.org/10.1371/journal.pbio.0060325>
- 825 Zhu, K., Woodall, C.W., Clark, J.S., 2012. Failure to migrate: Lack of tree range expansion in  
826 response to climate change. *Glob. Chang. Biol.* 18, 1042–1052.  
827 <https://doi.org/10.1111/j.1365-2486.2011.02571.x>
- 828 Zohren, J., 2016. Introgression in *Betula* Species of Different Ploidy Levels and the Analysis of  
829 the *Betula nana* Genome. Queen Mary University of London.
- 830 Zohren, J., Wang, N., Kardailsky, I., Borrell, J.S., Joecker, A., Nichols, R.A., Buggs, R.J.A., 2016.  
831 Unidirectional diploid-tetraploid introgression among British birch trees with shifting  
832 ranges shown by restriction site-associated markers. *Mol. Ecol.* 25, 2413–2426.  
833 <https://doi.org/10.1111/mec.13644>
- 834

835 **Tables**

836 **Table 1.** Contribution of retained environmental variables to the dwarf birch environmental  
837 niche model (ENM), and the number of environmentally associated loci detected.

| Variable | Description                         | Correlated Variables <sup>1</sup>                   | ENM percent contribution <sup>2</sup> | GEA Loci | GEA Loci (inc. cor.) <sup>3</sup> |
|----------|-------------------------------------|-----------------------------------------------------|---------------------------------------|----------|-----------------------------------|
| AMTemp   | Annual Mean Temperature             | MTColdQ, MTColdM                                    | 34.9                                  | 17       | 64                                |
| MTWarmM  | Max Temperature of Warmest Month    | MTWarmQ                                             | 22.1                                  | 2        | 6                                 |
| MDR      | Mean Diurnal Range                  | -                                                   | 14.8                                  | 71       | 71                                |
| ISO      | Isothermality                       | -                                                   | 14.6                                  | 11       | 11                                |
| APrec    | Annual Precipitation                | PColdQ, PWetM, PSeason, PWetQ, PWarmQ, PDryM, PDryQ | 7.3                                   | 2        | 21                                |
| Slope    | Slope                               | -                                                   | 2.8                                   | 7        | 7                                 |
| MTDryQ   | Mean Temperature of Driest Quarter  | -                                                   | 1.6                                   | 7        | 7                                 |
| TS       | Temperature Seasonality             | ATempR                                              | 1.4                                   | 1        | 3                                 |
| MTWetQ   | Mean Temperature of Wettest Quarter | -                                                   | 0.3                                   | 7        | 7                                 |
| Aspect   | Aspect                              | -                                                   | 0.2                                   | 4        | 4                                 |

<sup>1</sup> Correlated variables include Mean Temperature of the Coldest Quarter (MTColdQ); Minimum Temperature of the Coldest Month (MTColdM); Mean Temperature of Warmest Quarter (MTWarmQ); Precipitation of Coldest Quarter (PColdQ); Precipitation of Wettest Month (PWetM); Precipitation Seasonality (PSeason); Precipitation of Wettest Quarter (PWetQ); Precipitation of the Warmest Quarter (PWarmQ); Precipitation of Driest Month (PDryM); Precipitation of Driest Quarter (PDryQ); Annual Temperature Range (ATempR).

<sup>2</sup> Percentage contribution is calculated as the increase in regularized gain added to the contribution of the corresponding variable over each iteration of the model.

<sup>3</sup> Total number of SNPs associated with both the retained variable, as well as related highly correlated variables that were excluded from the ENM analysis.

838

839

840

841

842

843 **Table 2.** Summary information for 29 dwarf birch populations, including the number of  
844 genotyped and phenotyped individuals, habitat suitability (HSI).

| Location          | Pop. | Lat.  | Long. | Elev. (m) | Genotyped | Phenotyped | HSI  | c-RONA | Shapley <sub>NEUTRAL</sub> |
|-------------------|------|-------|-------|-----------|-----------|------------|------|--------|----------------------------|
| Ben Loyal         | BL   | 58.4  | -4.4  | 300       | 6         | 30         | 0.38 | 0.194  | 0.011                      |
| Meall Odhar       | MO   | 58.16 | -4.42 | 404       | 6         | 29         | 0.45 | 0.168  | 0.006                      |
| Beinn Enaiglair   | BE   | 57.79 | -5.01 | 480       | 5         | 27         | 0.37 | 0.479  | 0.01                       |
| Luichart          | LH   | 57.72 | -4.9  | 268       | 6         | 29         | 0.54 | 0.131  | 0.008                      |
| Ben Wyvis W       | BW   | 57.65 | -4.6  | 482       | 5         | 30         | 0.77 | 0.149  | 0.01                       |
| Ben Wyvis E*      | DG   | 57.65 | -4.56 | 472       | -         | 21         | 0.75 | -      | -                          |
| Loch Meig         | ME   | 57.53 | -4.8  | 450       | 6         | 26         | 0.57 | 0.128  | 0.005                      |
| Glen Cannich      | GC   | 57.34 | -4.86 | 455       | 6         | 31         | 0.51 | 0.045  | 0.027                      |
| Faskanyle*        | FS   | 57.33 | -4.85 | 486       | -         | 17         | 0.66 | -      | -                          |
| Dundreggan Excl.  | DE   | 57.23 | -4.75 | 448       | 6         | 30         | 0.81 | 0.174  | 0.009                      |
| An Suidhe         | AS   | 57.22 | -4.81 | 661       | 2         | 17         | 0.77 | 0.219  | 0.119                      |
| Beinn Bhreac      | BB   | 57.21 | -4.82 | 500       | 6         | 33         | 0.66 | 0.366  | 0.008                      |
| Portclair         | PC   | 57.2  | -4.64 | 478       | 6         | 38         | 0.54 | 0.081  | 0.008                      |
| River Avon        | AV   | 57.14 | -3.49 | 549       | 6         | 28         | 0.59 | 0.306  | 0.01                       |
| Monadhliaths      | MD   | 57.06 | -4.31 | 712       | 6         | 6          | 0.49 | 0.222  | 0.01                       |
| Meall an tslugain | SL   | 57.05 | -3.45 | 633       | 6         | 31         | 0.59 | 0.085  | 0.035                      |
| Loch Muick E      | MU1  | 56.92 | -3.2  | 492       | 6         | 31         | 0.17 | 0.223  | 0.006                      |
| Loch Muick W      | MU2  | 56.92 | -3.21 | 517       | 6         | 16         | 0.1  | 0.218  | 0.008                      |
| Loch Laggan       | LG   | 56.89 | -4.54 | 364       | 6         | 33         | 0.35 | 0.064  | 0.007                      |
| Loch Loch         | LL   | 56.85 | -3.65 | 673       | 6         | 32         | 0.57 | 0.106  | 0.005                      |
| Ben Gullabin      | BG   | 56.84 | -3.47 | 594       | 1         | 7†         | 0.58 | 0.194  | 0.422                      |
| Loch Rannoch      | LR   | 56.76 | -4.42 | 499       | 6         | 28         | 0.23 | 0.097  | 0.008                      |
| Rannoch West      | RW   | 56.65 | -4.79 | 306       | 6         | 32         | 0.61 | 0.218  | 0.007                      |
| Rannoch Moor B    | RB   | 56.6  | -4.74 | 304       | 6         | 10         | 0.51 | 0.169  | 0.008                      |
| Rannoch Moor A*   | RA   | 56.6  | -4.74 | 295       | -         | 27         | 0.51 | -      | -                          |
| Lennox            | LX   | 55.97 | -4.28 | 164       | 2         | 10         | 0    | 0.241  | 0.102                      |
| Emblehope†        | EM   | 55.24 | -2.48 | 448       | 1         | 1†         | 0.06 | 0.254  | 0.155                      |
| Spadeadam†        | SA   | 55.05 | -2.57 | 275       | 1         | 1†         | 0.01 | 0.321  | 0.35                       |
| Teesdale†         | TD   | 54.65 | -2.28 | 499       | 2         | 2†         | 0.06 | 0.291  | 0.133                      |

845 \*Populations not submitted for genetic analysis, but are considered in the comparison of HSI  
846 and reproductive output.

847 †Populations were exhaustively sampled.

848

849

850



## 851 **Figure Legends**

852 **Figure 1.** A) Environmental niche model of dwarf birch habitat suitability (HSI) under current  
853 environmental conditions, black points indicate species distribution records and red points  
854 indicate sampled locations included in this study. B) Regression of phenotypic fitness traits  
855 against the derived habitat suitability index. C) dwarf birch habitat suitability index  
856 projections under future climate scenarios.

857 **Figure 2.** Schematic diagram of current and future risk of non-adaptedness (c-RONA and f-  
858 RONA), presented on a genotype-environment association (GEA) plot; where genotypes are  
859 BLUP estimates of population polygenic allele frequency for 17 loci and the environmental  
860 predictor is Annual Mean Temperature. c/f-RONA is the average change in allele frequency  
861 required to match our estimated optimum for current environmental conditions. Where  
862 RONA is large, we show two possible adaptation strategies; i) Assisted migration indicates the  
863 change in environmental conditions required for a population to match a genotype-  
864 environment optimum. This could take the form of a translocation of individuals to a location  
865 with a more suitable climate (e.g. a higher elevation). ii) Assisted Gene Flow (which in small  
866 populations is equivalent to Genetic Rescue) proposes movement of genetic material from a  
867 donor population with allele frequencies predicted to be better suited to the environmental  
868 conditions at the focal population. We show that the allele frequency change is likely to be  
869 larger under an example future climate scenario of 1°C warming. Blue and red bands indicate  
870 suitable candidate donor populations for assisted gene flow under current and future  
871 scenarios respectively.

872 **Figure 3.** Barplot of Shapley index for neutral and adaptive loci across UK *B. nana*  
873 populations, ordered by latitude with northernmost populations to the left. Inset plots show  
874 the relationship between the log transformed Shapley Index and the current risk of non-  
875 adaptedness (c-RONA) for neutral and adaptive loci respectively.

876 **Figure 4.** Hypothetical plots of assisted gene flow (AGF) for dwarf birch in the UK. Arrows  
877 denote movement from donor to recipient populations (red circles). Blue populations report  
878 an allele frequency close to predicted optimums, thus introduction of novel diversity does not  
879 decrease c-RONA and is not required. Base maps show Annual Mean Temperature (AMTemp)  
880 and Mean Diurnal Range (MDR) environmental variables.

881 **Figure 5.** A) The relationship between c-RONA (for AMTemp) and mean population catkin  
882 count. B) Correlation between the number of loci identified in genotype-environment  
883 analyses, for each environmental variable, and the corresponding percentage contribution of  
884 that variable to the environmental niche model.

885

886

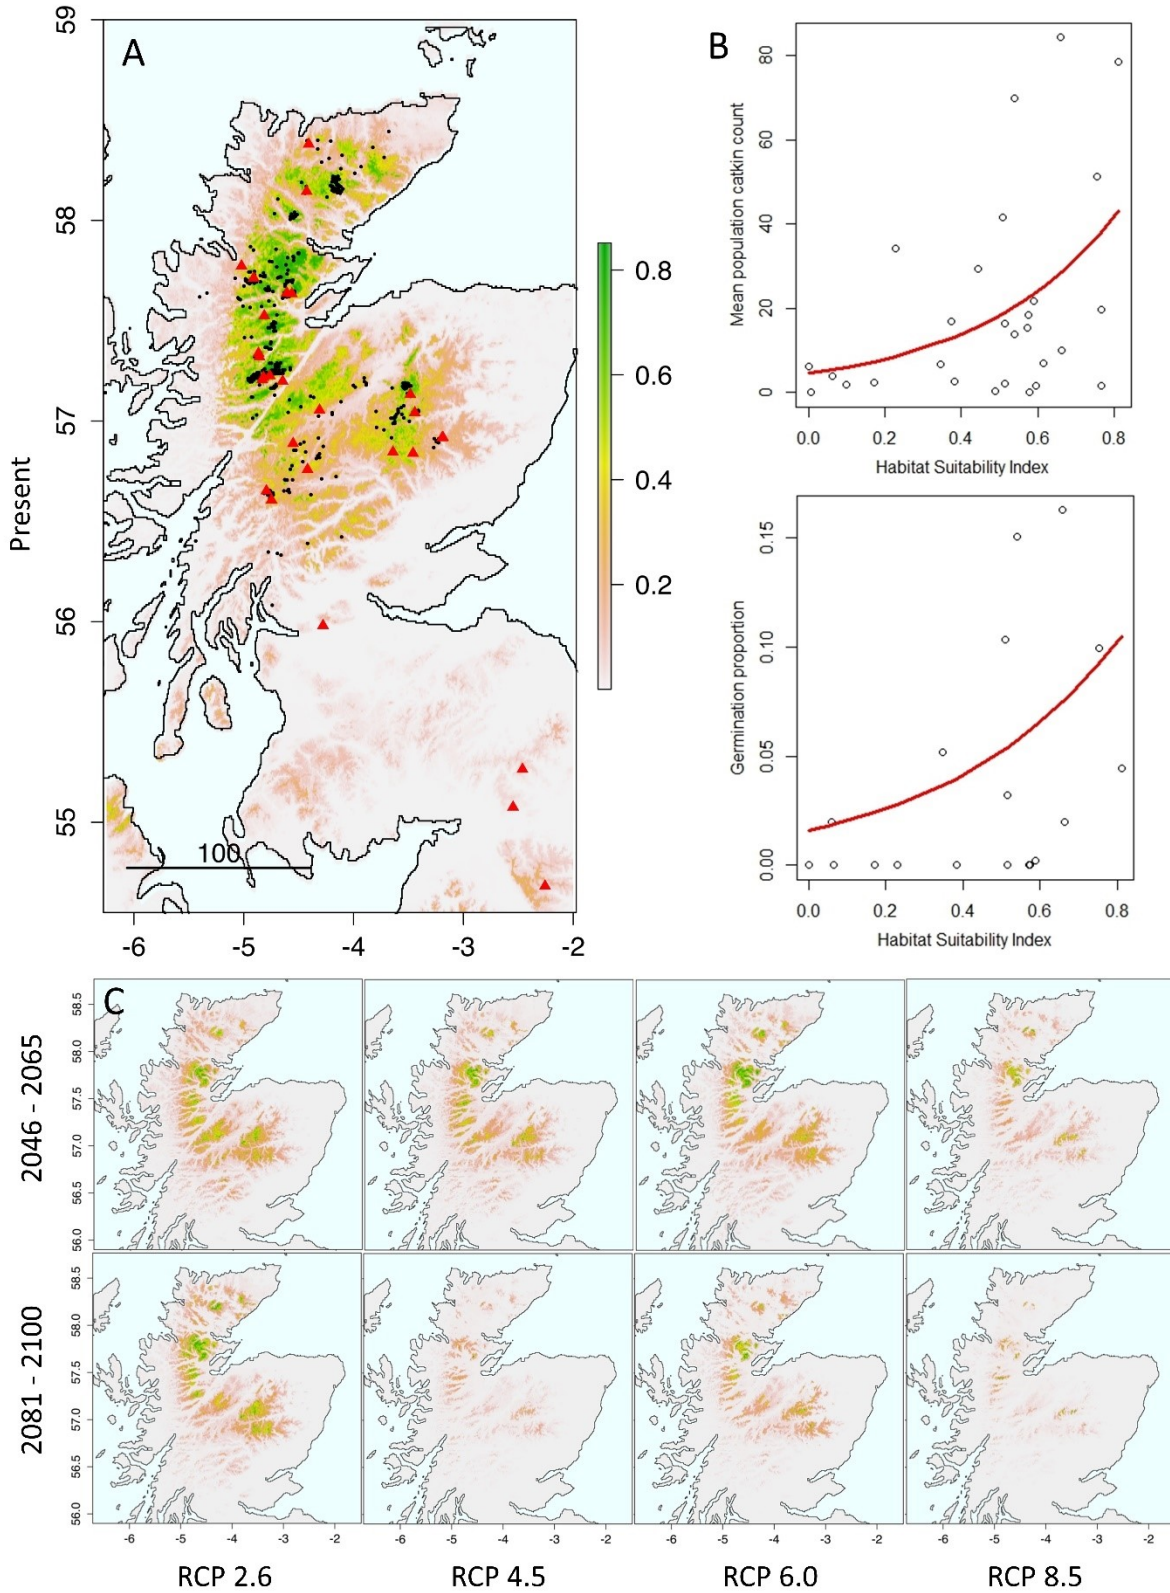

887

888

889 Figure 1.

890

891

892

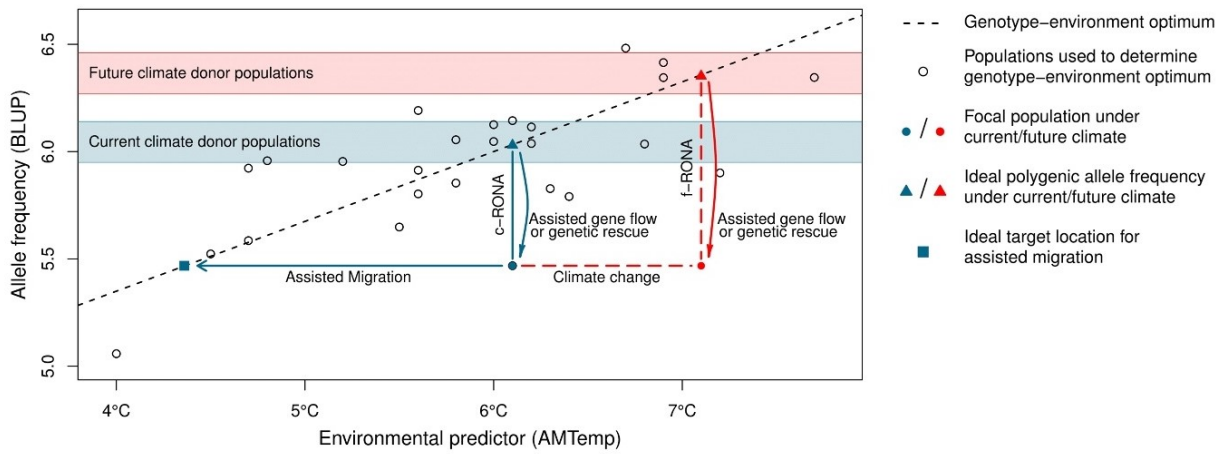

893

894 Figure 2.

895

896

897

898

899

900

901

902

903

904

905

906

907

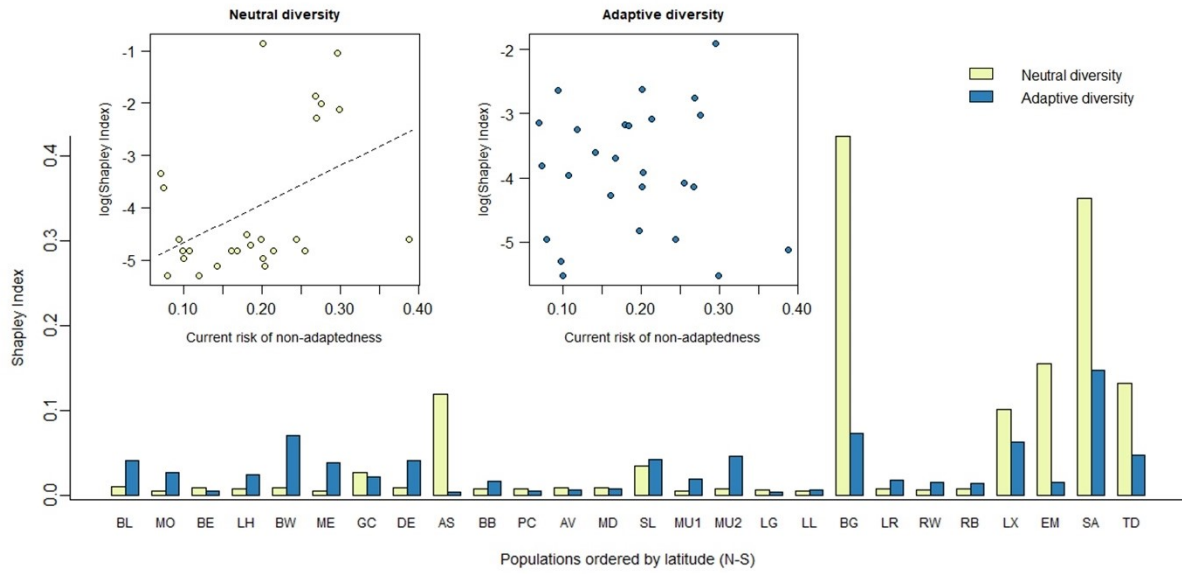

908 Figure 3.

909

910

911

912

913

914

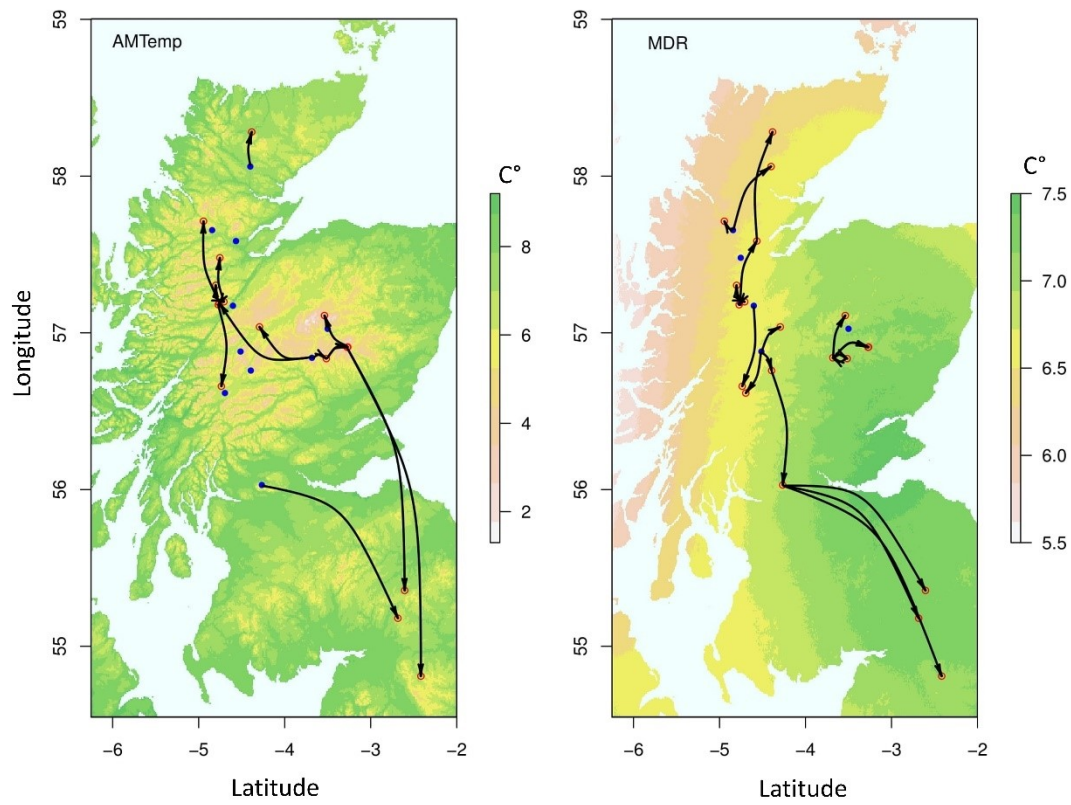

915  
916 Figure 4.

917  
918  
919  
920  
921  
922  
923  
924  
925  
926  
927  
928  
929  
930  
931

932

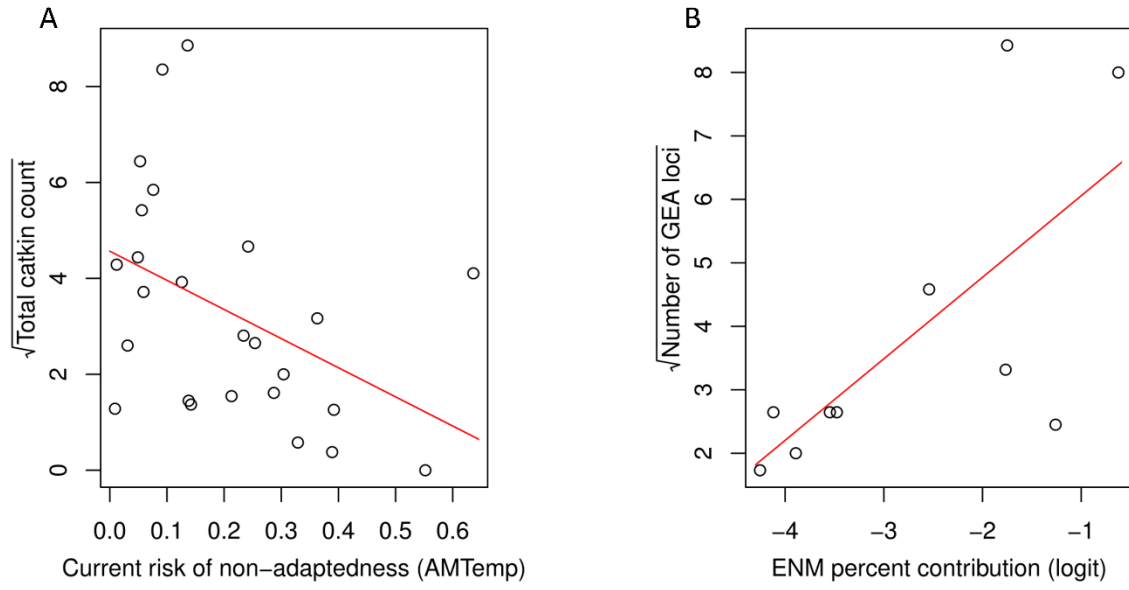

933

934 Figure 5.

935

936

937

938

939

940

941

942

943

944

945

946

947

## 948 **Supplementary Materials**

### 949 **Contents**

|     |                                                                |    |
|-----|----------------------------------------------------------------|----|
| 950 | Phenotyping and germination protocol .....                     | 41 |
| 951 | Redundancy Analysis of genotype-environment associations ..... | 42 |
| 952 | Supplementary Tables.....                                      | 44 |
| 953 | Supplementary Figures.....                                     | 53 |

954

955

956

957

958

959

960

961

962

963



## 964 **Phenotyping and germination protocol**

965 All UK populations were visited once or twice in the spring and summer of 2012, 2013 or 2014,  
966 once plants were in leaf to aid identification. For each individual, the following phenotypic  
967 measurements were made:

- 968 • Latitude and longitude (GPS: Garmin Oregon 550)
- 969 • Elevation (GPS based)
- 970 • Number of male and female catkins.
- 971 • Perpendicular eight from ground level.
- 972 • Browsing pressure (percentage of browsed stems, to nearest 5%).
- 973 • Plant area (length of the longest horizontal growing axis multiplied by maximum width  
974 perpendicular to this)
- 975 • Diameter of the largest available stem at ground level.

976 In the years 2013 and 2014, seeds were collected from a subset of 18 populations (9 per year) in  
977 Scotland to assess germination rates. We ensured that collected catkins displayed dry brown  
978 bracts and readily dehisced to ensure maturity. Catkins were placed in labelled glassine envelopes  
979 and further air-dried for 3-5 days before being stored at 4°C for planting the following Spring. It  
980 should be noted that collected catkins would have been from the previous year's growth, so not  
981 necessarily correlated to the female catkin count also reported in this study.

982 To assay germination, seeds were counted and spread on filter paper in individually labelled petri  
983 dishes. Where a large amount of seed was available for a given individual, petri dishes were  
984 replicated to avoid overcrowding. A thin layer of vermiculite was then added to prevent  
985 desiccation. Seeds were maintained at 18-20°C with a 14h photoperiod for 60 days. Germination  
986 was scored twice weekly and considered successful where a radicle  $\geq 5$ mm was observed. For

987 populations assayed in 2014, successfully germinated seedlings were transferred to a nutrient  
988 poor soil (similar to their preferred habitat) to assess survivability at 100 days.

## 989 **Redundancy Analysis of genotype-environment associations**

990 For comparison, we also tested the pattern of genotype-environment associations (GEA) using  
991 Redundancy Analysis (RDA), a method that has shown robust performance in scenarios of weak  
992 selection (Forester et al., 2018; Rellstab et al., 2015). RDA is a two-step analysis which extends  
993 multivariate linear regression to allow regression of multiple response variables on multiple  
994 explanatory variables. A PCA of the fitted values results in canonical axes which are linear  
995 combinations of the environmental predictors, therefore permitting identification of significant  
996 GEAs (Legendre and Legendre, 2012).

997 We implemented RDA in the R package *vegan* (Oksanen et al., 2019), using the full 14,889 SNP  
998 dataset, and a reduced set of environmental variables. Whilst we used all environmental predictor  
999 variables across independent runs of the Bayenv2 analysis (main text), here we use a reduced set  
1000 of environmental variables to avoid correlated predictors being analyzed together. The reduced  
1001 set of environmental variables was the same as those used for environmental niche modelling  
1002 ( $n=10$ ), with the additional exclusion of MTDryQ and MTWet ( $n=8$ ), which showed collinearity  $>$   
1003  $0.7$  in this reduced number of population sampling locations (variables for the ENM were assessed  
1004 across the whole study area).

1005 We followed the methodology outlined in (Forester et al., 2018), retaining candidate SNPs from  
1006 the first three axes, with a 2.5 standard deviation significance threshold. For each candidate SNP,  
1007 we first identified the environmental predictor with which it reported the highest correlation.  
1008 Second, we compare candidates to those identified in the Bayenv2 GEA analysis (main text).  
1009 Finally, we compare the number of SNPs associated with each environmental predictor variable  
1010 across both RDA and Bayenv2 methods.

1011 RDA identified 601 significant genotype-environment associations across eight retained predictor  
1012 variables (Table S6). In a comparison of candidates between GEA methods, 11.2% of significant  
1013 Bayenv2 loci were also significant in the RDA analysis. This is consistent with 9.4% of loci found in  
1014 common between Bayenv2 and RDA analyses in Schweizer *et al.* (2016) and Forester *et al.* (2018).  
1015 Finally, we report a highly significant correlation between the number of associations identified for  
1016 each environmental variable using RDA and Bayenv2 ( $F_{1,6} = 14.76$ ,  $p = 0.008$ ), Figure S5). We note  
1017 that this pattern was significant across a range of RDA significance thresholds, as well as with both  
1018 the loci directly associated with retained variables, and the loci correlated with retained variables  
1019 (see columns 5 and 6, Table 1), therefore we are satisfied it is a robust and repeatable pattern.

1020

1021

1022

1023

1024

1025

1026

1027

1028

1029

1030

1031

1032

1033

1034

1035

1036

1037 **Supplementary Tables**

1038

1039

1040

**Table S1.** Projected change in global mean surface air temperature, relative to the period 1986–2005. Adapted from (IPCC, 2014b).

1041

1042

1043

1044

1045

1046

1047

| Scenario | 2046-2065                       | 2081-2100                       |
|----------|---------------------------------|---------------------------------|
|          | Mean $\Delta$ °C (Likely range) | Mean $\Delta$ °C (Likely range) |
| RCP2.6   | +1.0 (0.4 to 1.6)               | +1.0 (0.3 to 1.7)               |
| RCP4.5   | +1.4 (0.9 to 2.0)               | +1.8 (1.1 to 2.6)               |
| RCP6.0   | +1.3 (0.8 to 1.8)               | +2.2 (1.4 to 3.1)               |
| RCP8.5   | +2.0 (1.4 to 2.6)               | +3.7 (2.6 to 4.8)               |

1048

1049

1050

1051

1052

1053

1054

1055

1056

1057

1058

1059

1060

1061 **Table S2.** Changes in suitable habitat area as defined by ‘maximum training sensitivity plus  
1062 specificity’ threshold for dwarf birch under IPCC future climate scenarios.

| Period    | Scenario | Suitable<br>Area (Km <sup>2</sup> ) | Suitable<br>Area (%) |
|-----------|----------|-------------------------------------|----------------------|
| 1960-1990 | Present  | 11415                               | 100.00               |
|           | RCP2.6   | 2799                                | 24.52                |
| 2045-2065 | RCP4.5   | 1774                                | 15.54                |
|           | RCP6.0   | 2783                                | 24.38                |
|           | RCP8.5   | 952                                 | 8.34                 |
|           | RCP2.6   | 3021                                | 26.47                |
| 2081-2100 | RCP4.5   | 463                                 | 4.06                 |
|           | RCP6.0   | 1406                                | 12.32                |
|           | RCP8.5   | 128                                 | 1.12                 |

1063

1064

1065

1066

1067

1068

1069

1070

1071

1072

1073

1074

1075 **Table S3.** Phenotypic data summary for sampled dwarf birch populations.

| Site              | Pop | Lat.  | Long. | Male catkins | Female catkins | Area (m <sup>2</sup> ) | Height (cm) | Perc. browsing (%) | Stem (mm) |
|-------------------|-----|-------|-------|--------------|----------------|------------------------|-------------|--------------------|-----------|
| Ben Loyal         | BL  | 58.40 | -4.40 | 0.17         | 2.43           | 0.27                   | 13.13       | 41                 | 4.25      |
| Meall Odhar       | MO  | 58.16 | -4.42 | 1.03         | 28.34          | 0.61                   | 21.69       | 16                 | 3.88      |
| Beinn Enaiglair   | BE  | 57.79 | -5.01 | 1.52         | 15.33          | 0.23                   | 24          | 31                 | 5.11      |
| Luichart          | LH  | 57.72 | -4.90 | 1.42         | 12.39          | 0.62                   | 23.52       | 40                 | 5.77      |
| Ben Wyvis         | BW  | 57.65 | -4.60 | 3.13         | 16.57          | 0.35                   | 19.77       | 19                 | 4.8       |
| DJG Ben Wyvis     | DG  | 57.65 | -4.56 | -            | -              | -                      | -           | -                  | 6.86      |
| Loch Meig         | ME  | 57.53 | -4.80 | 5.42         | 9.96           | 0.70                   | 23.67       | 36                 | 7.67      |
| Glen Cannich      | GC  | 57.34 | -4.86 | 3.84         | 37.65          | 1.33                   | 26.26       | 9                  | 5.69      |
| Faskanyle         | FS  | 57.33 | -4.85 | 32.3         | 57.19          | 0.89                   | 38.1        | 12                 | 5.54      |
| Dundreggan Excl.  | DE  | 57.23 | -4.75 | 24.8         | 56.31          | 0.92                   | 28.97       | 0                  | 5.5       |
| An Suidhe         | AS  | 57.22 | -4.81 | 0.71         | 0.88           | 0.89                   | 12.76       | 6                  | 4.5       |
| Beinn Bhreac      | BB  | 57.21 | -4.82 | 5.15         | 4.88           | 0.72                   | 15.15       | 40                 | 5.2       |
| Portclair         | PC  | 57.20 | -4.64 | 8.16         | 61.63          | 8.71                   | 36.58       | 20                 | 7.3       |
| River Avon        | AV  | 57.14 | -3.49 | 9.00         | 12.75          | 0.58                   | 38.75       | 29                 | 8.48      |
| Monadhliaths      | MD  | 57.06 | -4.31 | 0.00         | 0.33           | 1.03                   | 11.0        | 25                 | 4.67      |
| Meall an tslugain | SL  | 57.05 | -3.45 | 1.42         | 0.23           | 0.93                   | 15.08       | 51                 | 3.88      |
| Loch Muick 1      | MU1 | 56.92 | -3.20 | 1.45         | 0.94           | 0.54                   | 37.52       | 40                 | 9.61      |
| Loch Muick 2      | MU2 | 56.92 | -3.21 | 0.69         | 1.19           | 1.25                   | 50.06       | 41                 | 14.59     |
| Loch Laggan       | LG  | 56.89 | -4.54 | 0.77         | 6.77           | 0.64                   | 23.73       | 43                 | 6.81      |
| Loch Loch         | LL  | 56.85 | -3.65 | 11.5         | 6.84           | 0.99                   | 21.72       | 43                 | 6.75      |
| Ben Gullabin      | BG  | 56.84 | -3.47 | 0.14         | 0.00           | 1.18                   | 15.57       | 66                 | 4.29      |
| Loch Rannoch      | LR  | 56.76 | -4.42 | 8.71         | 25.46          | 0.25                   | 23.04       | 14                 | 5.13      |
| Rannoch West      | RW  | 56.65 | -4.79 | 3.75         | 3.28           | 0.19                   | 22.72       | 38                 | 5.08      |
| Rannoch Moor B    | RB  | 56.60 | -4.74 | 0.00         | 2.10           | -                      | -           | 13                 | 3.89      |
| Rannoch Moor A    | RA  | 56.60 | -4.74 | 3.93         | 12.6           | 0.88                   | 15.7        | 13                 | 5.76      |
| Lennox            | LX  | 55.97 | -4.28 | 2.00         | 5.88           | -                      | 41.0        | -                  | 6.5       |
| Emblehope*        | EM  | 55.24 | -2.48 | 50.0         | 300            | 25.0                   | 60.0        | 10                 | 15        |
| Spadeadam         | SA  | 55.05 | -2.57 | 0.00         | 0.00           | -                      | 45.0        | -                  | 15        |
| Teesdale          | TD  | 54.65 | -2.28 | 0.00         | 4.00           | -                      | 18.5        | 18                 | 5.5       |

1076 \*Emblehope consisted of a single very large, presumably clonal individual, with an extremely high number of catkins.  
1077 This single data point strongly influenced subsequent analyses thus it was excluded as an outlier.

1078 **Table S4.** Germination success and survivability summary data for assayed populations.

| Year       | Population | Individuals | Seeds Planted | Germinated | Germ. % | 100-Day Survivability | Surv. % |
|------------|------------|-------------|---------------|------------|---------|-----------------------|---------|
| 2013       | AV         | 13          | 438           | 1          | 0.23    | -                     | -       |
| 2013       | BB         | 7           | 102           | 2          | 1.96    | -                     | -       |
| 2013       | BL         | 2           | 35            | 0          | 0.00    | -                     | -       |
| 2013       | DE         | 17          | 540           | 24         | 4.44    | -                     | -       |
| 2013       | GC         | 8           | 833           | 68         | 8.16    | -                     | -       |
| 2013       | LL         | 10          | 187           | 0          | 0.00    | -                     | -       |
| 2013       | LR         | 6           | 63            | 0          | 0.00    | -                     | -       |
| 2013       | ME         | 3           | 67            | 0          | 0.00    | -                     | -       |
| 2013       | MU         | 8           | 151           | 0          | 0.00    | -                     | -       |
| Total 2013 |            | 74          | 2416          | 95         | 3.93    | -                     | -       |
| 2014       | DJG        | 21          | 1345          | 134        | 9.96    | 27                    | 2.01    |
| 2014       | FS         | 23          | 492           | 89         | 18.09   | 86                    | 17.48   |
| 2014       | LG         | 31          | 310           | 16         | 5.16    | 15                    | 4.84    |
| 2014       | LX         | 5           | 230           | 0          | 0.00    | 0                     | 0.00    |
| 2014       | RA         | 2           | 31            | 1          | 3.23    | 0                     | 0.00    |
| 2014       | RB         | 3           | 21            | 0          | 0.00    | 0                     | 0.00    |
| 2014       | PC         | 28          | 672           | 101        | 15.03   | 77                    | 11.46   |
| 2014       | TD         | 2           | 14            | 0          | 0.00    | 0                     | 0.00    |
| 2014       | EM         | 1           | 250           | 5          | 2.00    | 1                     | 0.40    |
| Total 2014 |            | 116         | 3365          | 346        | 10.28   | 206                   | 6.12    |

1079

1080

1081

1082

1083

1084

1085 **Table S5.** The 24 environmental variables included in this study. Uncorrelated retained  
 1086 environmental variables were used for Environmental Niche Modelling (ENM), whilst all variables  
 1087 were tested independently for genotype-environment associations (GEA).

| Variable | Description                         | Retained for ENM | Grouping | Bayenv2 GEA Loci (totals inc. cor.) |
|----------|-------------------------------------|------------------|----------|-------------------------------------|
| AMTemp   | Annual Mean Temperature             | X                | A        | 17 (64)                             |
| MTColdQ  | Mean Temperature of Coldest Quarter |                  | A        | 24                                  |
| MTColdM  | Min Temperature of Coldest Month    |                  | A        | 23                                  |
| MTWarmM  | Max Temperature of Warmest Month    | X                | B        | 2 (6)                               |
| MTWarmQ  | Mean Temperature of Warmest Quarter |                  | B        | 4                                   |
| MDR      | Mean Diurnal Temperature Range      | X                | C        | 71 (71)                             |
| ISO      | Isothermality                       | X                | D        | 11 (11)                             |
| APrec    | Annual Precipitation                | X                | E        | 2 (21)                              |
| PWetQ    | Precipitation of Wettest Quarter    |                  | E        | 2                                   |
| PDryQ    | Precipitation of Driest Quarter     |                  | E        | 4                                   |
| PWetM    | Precipitation of Wettest Month      |                  | E        | 2                                   |
| PDryM    | Precipitation of Driest Month       |                  | E        | 3                                   |
| Pseason  | Precipitation Seasonality           |                  | E        | 1                                   |
| PWarmQ   | Precipitation of Warmest Quarter    |                  | E        | 4                                   |
| PColdQ   | Precipitation of Coldest Quarter    |                  | E        | 3                                   |
| Slope    | Slope (derived from elevation)      | X                | F        | 7 (7)                               |
| MTDryQ   | Mean Temperature of Driest Quarter  | X                | G        | 7 (7)                               |
| Tseason  | Temperature Seasonality             | X                | H        | 1 (3)                               |
| ATempR   | Annual Temperature Range            |                  | H        | 2                                   |
| MTWetQ   | Mean Temperature of Wettest Quarter | X                | I        | 7 (7)                               |
| Aspect   | Aspect (derived from elevation)     | X                | J        | 4 (4)                               |
| Elev.    | Elevation                           | -                | -        | 12                                  |
| Lat.     | Latitude                            | -                | -        | 6                                   |
| Long.    | Longitude                           | -                | -        | 48                                  |

1088

1089

1090

1091



1092 **Table S6.** Comparison of GEA candidate loci identified in RDA and Bayenv2 analysis

| Variable | GEA Loci | GEA Loci (inc. cor.) | RDA (s.d. = 3) | RDA (s.d. =2.5) |
|----------|----------|----------------------|----------------|-----------------|
| AMTemp   | 17       | 64                   | 21             | 101             |
| MTWarmM  | 2        | 6                    | 3              | 37              |
| MDR      | 71       | 71                   | 40             | 134             |
| ISO      | 11       | 11                   | 16             | 69              |
| APrec    | 2        | 21                   | 20             | 82              |
| Slope    | 7        | 7                    | 17             | 93              |
| MTDryQ   | 7        | 7                    | -              | -               |
| TS       | 1        | 3                    | 13             | 41              |
| MTWetQ   | 7        | 7                    | -              | -               |
| Aspect   | 4        | 4                    | 13             | 44              |

1093

1094

1095

1096

1097

1098

1099

1100

1101

1102

1103

1104

1105 **Table S7.** Current risk of non-adaptedness across all genotype-environment analyses for retained  
 1106 environmental variables.

| pop | AMTemp | MDR   | ISO   | MTColdM | MTWetQ | MTDryQ | MTColdQ | Slope | Elev. | Combined |
|-----|--------|-------|-------|---------|--------|--------|---------|-------|-------|----------|
| BL  | 0.287  | 0.188 | 0.216 | 0.374   | 0.349  | 0.021  | 0.079   | 0.091 | 0.011 | 0.18     |
| MO  | 0.056  | 0.232 | 0.237 | 0.117   | 0.167  | 0.251  | 0.156   | 0.043 | 0.018 | 0.14     |
| BE  | 0.636  | 0.483 | 0.46  | 0.672   | 0.135  | 0.222  | 0.637   | 0.23  | 0.015 | 0.39     |
| LH  | 0.059  | 0.069 | 0.48  | 0.307   | 0.009  | 0.39   | 0.057   | 0.131 | 0.006 | 0.17     |
| BW  | 0.049  | 0.283 | 0.318 | 0.017   | 0.02   | 0.08   | 0.028   | 0.05  | 0.003 | 0.09     |
| ME  | 0.126  | 0.135 | 0.081 | 0.078   | 0.013  | 0.383  | 0.22    | 0.015 | 0.018 | 0.12     |
| GC  | 0.053  | 0.017 | 0.077 | 0.082   | 0.064  | 0.196  | 0.006   | 0.157 | 0.013 | 0.07     |
| DE  | 0.136  | 0.159 | 0.353 | 0.048   | 0.114  | 0.373  | 0.323   | 0.144 | 0.012 | 0.18     |
| AS  | 0.392  | 0.085 | 0.144 | 0.347   | 0.02   | 0.559  | 0.267   | 0.843 | 0.032 | 0.30     |
| BB  | 0.363  | 0.469 | 0.3   | 0.337   | 0.056  | 0.146  | 0.516   | 0.106 | 0.005 | 0.26     |
| PC  | 0.092  | 0.058 | 0.071 | 0.166   | 0.044  | 0.297  | 0.036   | 0.115 | 0.001 | 0.10     |
| AV  | 0.242  | 0.317 | 0.348 | 0.464   | 0.014  | 0.268  | 0.443   | 0.08  | 0.016 | 0.24     |
| MD  | 0.329  | 0.125 | 0.078 | 0.377   | 0.061  | 0.09   | 0.554   | 0.162 | 0.006 | 0.20     |
| SL  | 0.009  | 0.117 | 0.111 | 0.09    | 0.033  | 0.102  | 0.067   | 0.065 | 0.032 | 0.07     |
| MU1 | 0.213  | 0.311 | 0.561 | 0.09    | 0.012  | 0.536  | 0.066   | 0.027 | 0.009 | 0.20     |
| MU2 | 0.142  | 0.314 | 0.55  | 0.036   | 0.089  | 0.161  | 0.063   | 0.566 | 0.003 | 0.21     |
| LG  | 0.031  | 0.05  | 0.164 | 0.031   | 0.076  | 0.292  | 0.027   | 0.226 | 0.001 | 0.10     |
| LL  | 0.012  | 0.149 | 0.23  | 0.026   | 0.005  | 0.026  | 0.161   | 0.075 | 0.025 | 0.08     |
| BG  | 0.389  | 0.204 | 0.05  | 0.041   | 0.063  | 0.769  | 0.23    | 0.039 | 0.026 | 0.20     |
| LR  | 0.076  | 0.125 | 0.141 | 0.051   | 0.003  | 0.53   | 0.02    | 0.013 | 0.001 | 0.11     |
| RW  | 0.254  | 0.258 | 0.109 | 0.309   | 0.2    | 0.509  | 0.099   | 0.072 | 0.002 | 0.20     |
| RB  | 0.138  | 0.16  | 0.402 | 0.253   | 0.063  | 0.155  | 0.159   | 0.112 | 0.007 | 0.16     |
| LX  | 0.234  | 0.17  | 0.561 | 0.22    | 0.325  | 0.455  | 0.41    | 0.046 | 0.001 | 0.27     |
| EM  | 0.383  | 0.292 | 0.479 | 0.128   | 0.175  | 0.756  | 0.109   | 0.084 | 0.008 | 0.27     |
| SA  | 0.552  | 0.317 | 0.54  | 0.541   | 0.023  | 0.464  | 0.109   | 0.107 | 0.011 | 0.30     |
| TD  | 0.304  | 0.211 | 0.149 | 0.558   | 0.174  | 0.55   | 0.491   | 0.038 | 0.008 | 0.28     |

1107

1108

1109

1110 **Table S8.** Risk of non-adaptedness under current and future climate scenarios, excluding  
 1111 associations with altitude and slope.

| Pop  | c-RONA<br>(no-elev/slope) | f-RONA (2045-2065) |        |        |        | f-RONA (2081-2100) |        |        |        |
|------|---------------------------|--------------------|--------|--------|--------|--------------------|--------|--------|--------|
|      |                           | RCP2.6             | RCP4.5 | RCP6.0 | RCP8.5 | RCP2.6             | RCP4.5 | RCP6.0 | RCP8.5 |
| BL   | 0.216                     | 0.272              | 0.311  | 0.262  | 0.375  | 0.280              | 0.236  | 0.254  | 0.242  |
| MO   | 0.174                     | 0.243              | 0.286  | 0.231  | 0.360  | 0.247              | 0.247  | 0.255  | 0.218  |
| BE   | 0.463                     | 0.455              | 0.478  | 0.458  | 0.521  | 0.454              | 0.405  | 0.483  | 0.426  |
| LH   | 0.196                     | 0.167              | 0.243  | 0.190  | 0.306  | 0.187              | 0.199  | 0.169  | 0.189  |
| BW   | 0.113                     | 0.135              | 0.205  | 0.104  | 0.218  | 0.127              | 0.089  | 0.134  | 0.103  |
| ME   | 0.148                     | 0.255              | 0.104  | 0.244  | 0.165  | 0.225              | 0.203  | 0.233  | 0.202  |
| GC   | 0.071                     | 0.182              | 0.076  | 0.159  | 0.086  | 0.188              | 0.116  | 0.188  | 0.113  |
| DE   | 0.215                     | 0.338              | 0.275  | 0.175  | 0.274  | 0.338              | 0.231  | 0.304  | 0.235  |
| AS   | 0.259                     | 0.278              | 0.220  | 0.274  | 0.223  | 0.294              | 0.267  | 0.300  | 0.305  |
| BB   | 0.312                     | 0.398              | 0.392  | 0.433  | 0.354  | 0.417              | 0.294  | 0.419  | 0.323  |
| PC   | 0.109                     | 0.117              | 0.202  | 0.107  | 0.163  | 0.114              | 0.157  | 0.112  | 0.161  |
| AV   | 0.299                     | 0.333              | 0.407  | 0.296  | 0.323  | 0.322              | 0.300  | 0.317  | 0.290  |
| MD   | 0.230                     | 0.422              | 0.374  | 0.453  | 0.344  | 0.415              | 0.214  | 0.436  | 0.226  |
| SL   | 0.075                     | 0.080              | 0.108  | 0.085  | 0.186  | 0.074              | 0.048  | 0.081  | 0.088  |
| MU1  | 0.255                     | 0.244              | 0.210  | 0.243  | 0.320  | 0.236              | 0.228  | 0.258  | 0.240  |
| MU2  | 0.193                     | 0.241              | 0.261  | 0.206  | 0.310  | 0.207              | 0.211  | 0.233  | 0.205  |
| LG   | 0.096                     | 0.160              | 0.136  | 0.180  | 0.135  | 0.170              | 0.123  | 0.167  | 0.133  |
| LL   | 0.087                     | 0.078              | 0.219  | 0.087  | 0.201  | 0.089              | 0.081  | 0.069  | 0.086  |
| BG   | 0.250                     | 0.254              | 0.185  | 0.251  | 0.124  | 0.237              | 0.240  | 0.238  | 0.232  |
| LR   | 0.135                     | 0.130              | 0.083  | 0.123  | 0.075  | 0.142              | 0.095  | 0.093  | 0.104  |
| RW   | 0.248                     | 0.240              | 0.236  | 0.206  | 0.243  | 0.170              | 0.212  | 0.236  | 0.263  |
| RB   | 0.190                     | 0.159              | 0.194  | 0.184  | 0.234  | 0.190              | 0.216  | 0.203  | 0.172  |
| LX   | 0.339                     | 0.523              | 0.538  | 0.497  | 0.387  | 0.535              | 0.327  | 0.523  | 0.350  |
| EM   | 0.332                     | 0.387              | 0.398  | 0.397  | 0.388  | 0.260              | 0.324  | 0.242  | 0.369  |
| SA   | 0.364                     | 0.329              | 0.360  | 0.322  | 0.333  | 0.357              | 0.374  | 0.344  | 0.375  |
| TD   | 0.348                     | 0.421              | 0.385  | 0.433  | 0.365  | 0.431              | 0.355  | 0.436  | 0.342  |
| Mean | 0.220                     | 0.263              | 0.265  | 0.254  | 0.270  | 0.258              | 0.223  | 0.259  | 0.230  |

1112

1113

1114 **Table S9.** Shapley values for neutral and putative adaptive loci, and population c-RONA ordered by  
 1115 rank. Final column represents a consensus ranking with Shapley Index for adaptive loci maximized  
 1116 and c-RONA minimized to optimize both adaptive diversity and current local adaptation.

| Pop | Shapley (neutral) | Pop | Shapley (adaptive) | Pop | c-RONA | Consensus rank |
|-----|-------------------|-----|--------------------|-----|--------|----------------|
| BG  | 0.422             | SA  | 0.148              | GC  | 0.045  | GC             |
| SA  | 0.350             | BG  | 0.073              | LG  | 0.064  | SL             |
| EM  | 0.155             | BW  | 0.071              | PC  | 0.081  | BW             |
| TD  | 0.133             | LX  | 0.063              | SL  | 0.085  | LR             |
| AS  | 0.119             | TD  | 0.048              | LR  | 0.097  | BL             |
| LX  | 0.102             | MU2 | 0.046              | LL  | 0.106  | DE             |
| SL  | 0.035             | SL  | 0.043              | ME  | 0.128  | ME             |
| GC  | 0.027             | BL  | 0.042              | LH  | 0.131  | LH             |
| BL  | 0.011             | DE  | 0.041              | BW  | 0.149  | MO             |
| AV  | 0.010             | ME  | 0.039              | MO  | 0.168  | BG             |
| BW  | 0.010             | MO  | 0.027              | RB  | 0.169  | RB             |
| MD  | 0.010             | LH  | 0.025              | DE  | 0.174  | LX             |
| BE  | 0.010             | GC  | 0.022              | BL  | 0.194  | MU2            |
| DE  | 0.009             | MU1 | 0.020              | BG  | 0.194  | MU1            |
| LR  | 0.008             | LR  | 0.019              | MU2 | 0.218  | RW             |
| BB  | 0.008             | BB  | 0.017              | RW  | 0.218  | TD             |
| RB  | 0.008             | RW  | 0.016              | AS  | 0.219  | LL             |
| PC  | 0.008             | EM  | 0.016              | MD  | 0.222  | MD             |
| MU2 | 0.008             | RB  | 0.014              | MU1 | 0.223  | EM             |
| LH  | 0.008             | MD  | 0.008              | LX  | 0.241  | BB             |
| RW  | 0.007             | AV  | 0.007              | EM  | 0.254  | AV             |
| LG  | 0.007             | LL  | 0.007              | TD  | 0.291  | PC             |
| MO  | 0.006             | BE  | 0.006              | AV  | 0.306  | SA             |
| MU1 | 0.006             | PC  | 0.005              | SA  | 0.321  | LG             |
| ME  | 0.005             | LG  | 0.004              | BB  | 0.366  | AS             |
| LL  | 0.005             | AS  | 0.004              | BE  | 0.479  | BE             |

1118 **Supplementary Figures**

1119

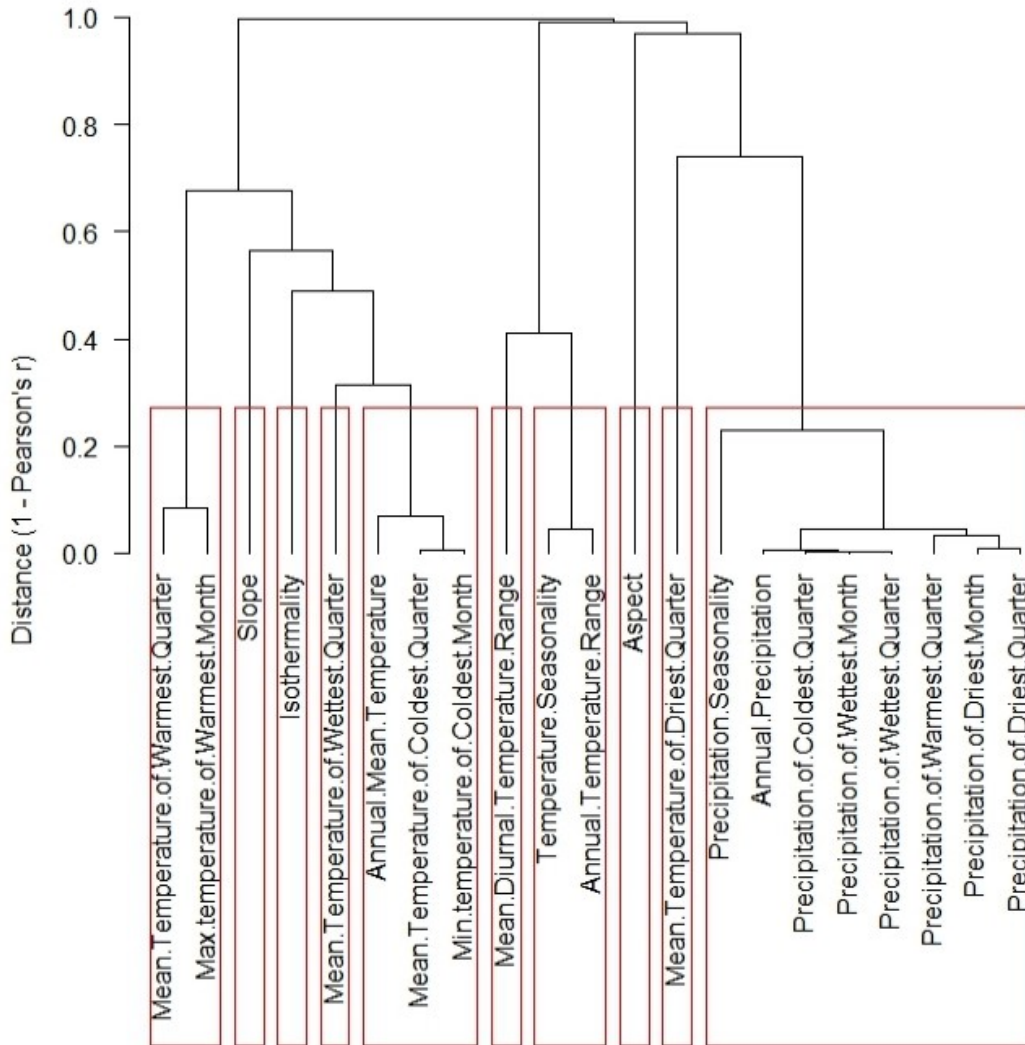

1120

1121 **Figure S1.** Topology of collinearity between environmental variables used in this study, at a  
1122 threshold of 0.7. Red boxes denote groups of retained variables (see Table S5).

1123

1124

1125

1126

1127

1128

1129

1130

1131

1132

1133

1134

1135

1136

1137

1138

1139

1140

1141

1142

1143

1144

1145

1146

1147

1148

1149

1150

1151

1152

1153

1154

1155

1156

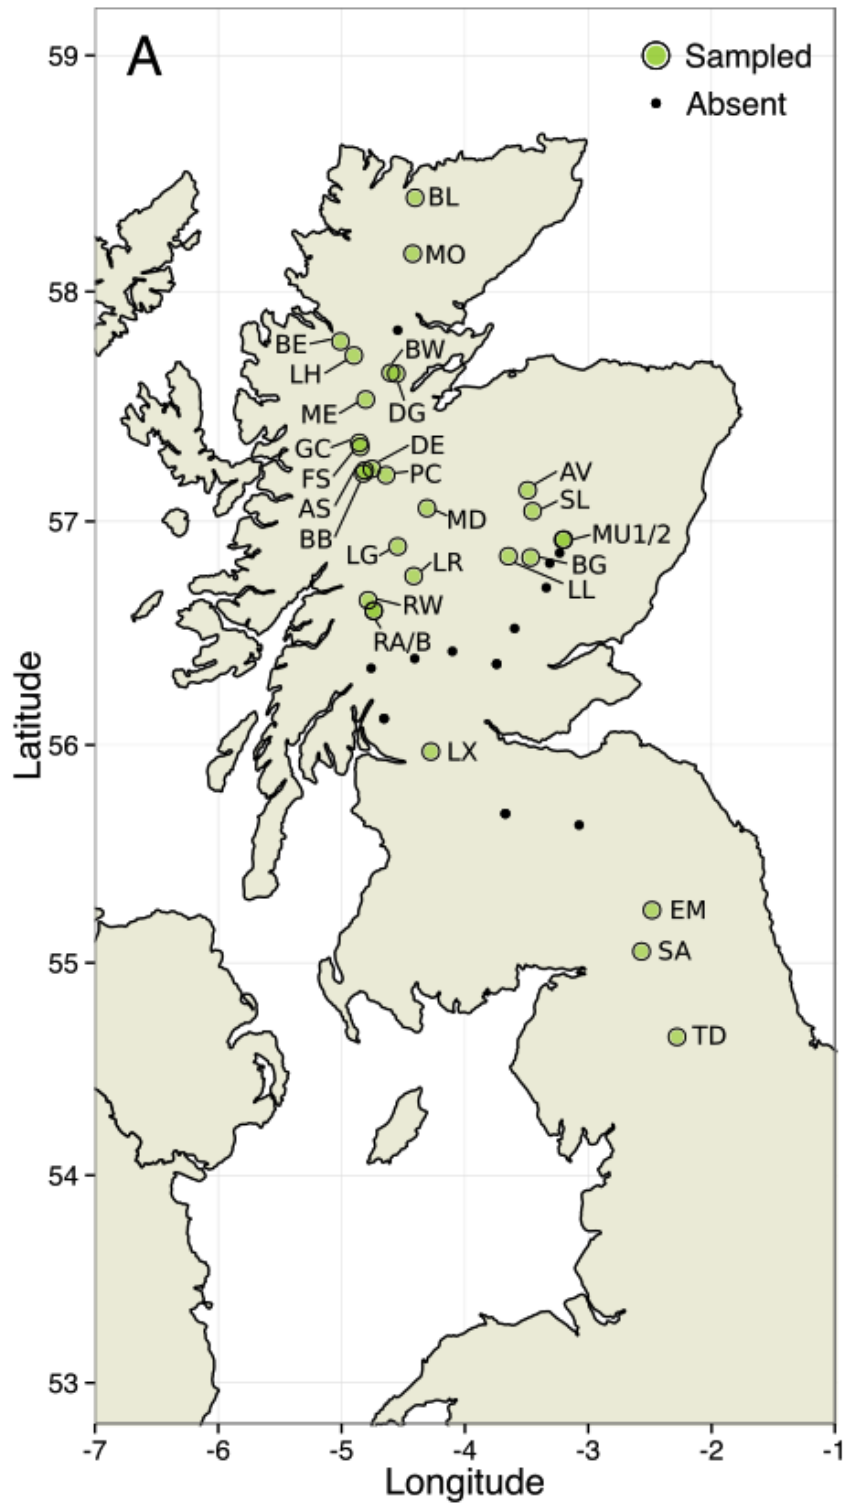

**Figure S2.** Map of dwarf birch sampling locations in the UK. Adapted from (Borrell et al., 2018).

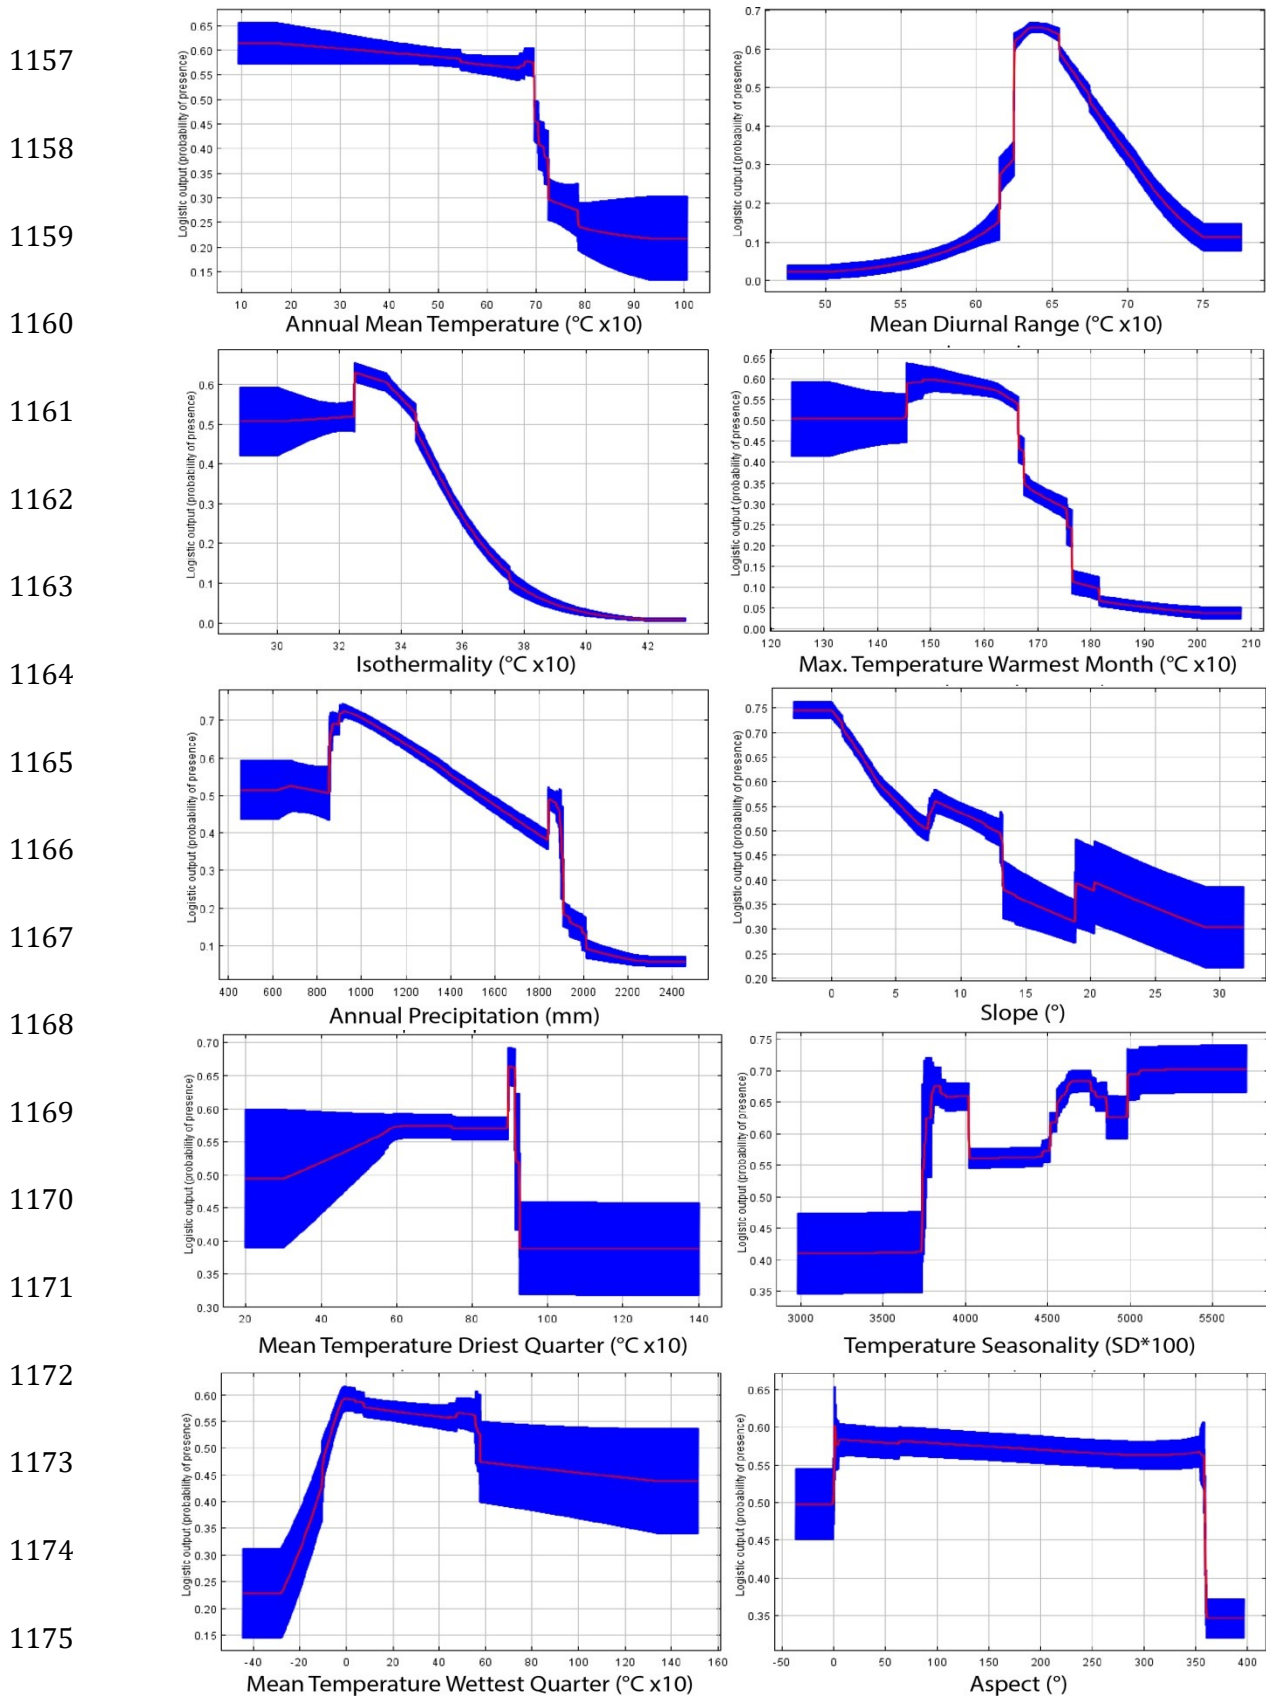

1177 **Figure S3.** Environmental niche model variable response curves for the 10 retained environmental  
1178 variables used in this study.

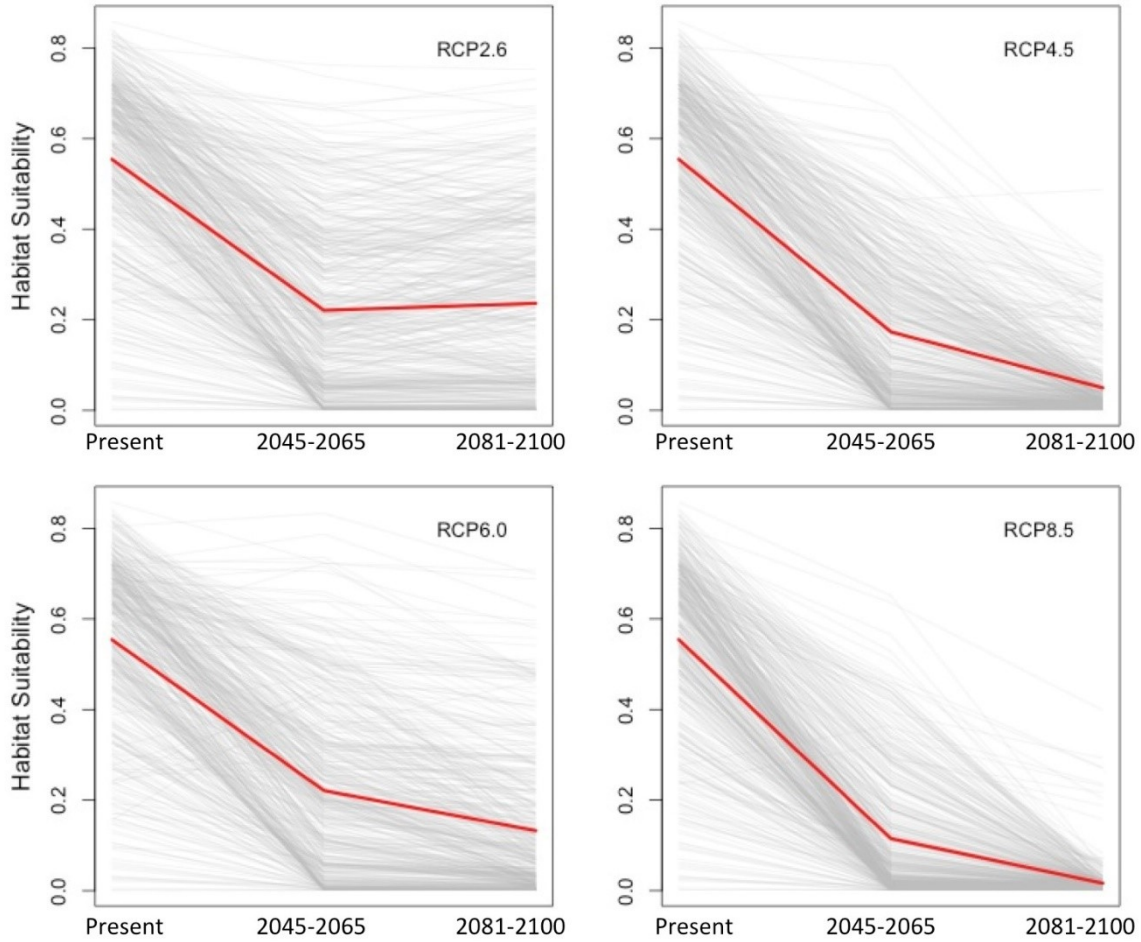

1179

1180 **Figure S4.** Changes in environmental niche model derived habitat suitability index (HSI) for dwarf  
1181 birch under four future climate scenarios. Red line indicates overall mean for all recorded locations

1182

1183

1184

1185

1186

1187

1188

1189

1190



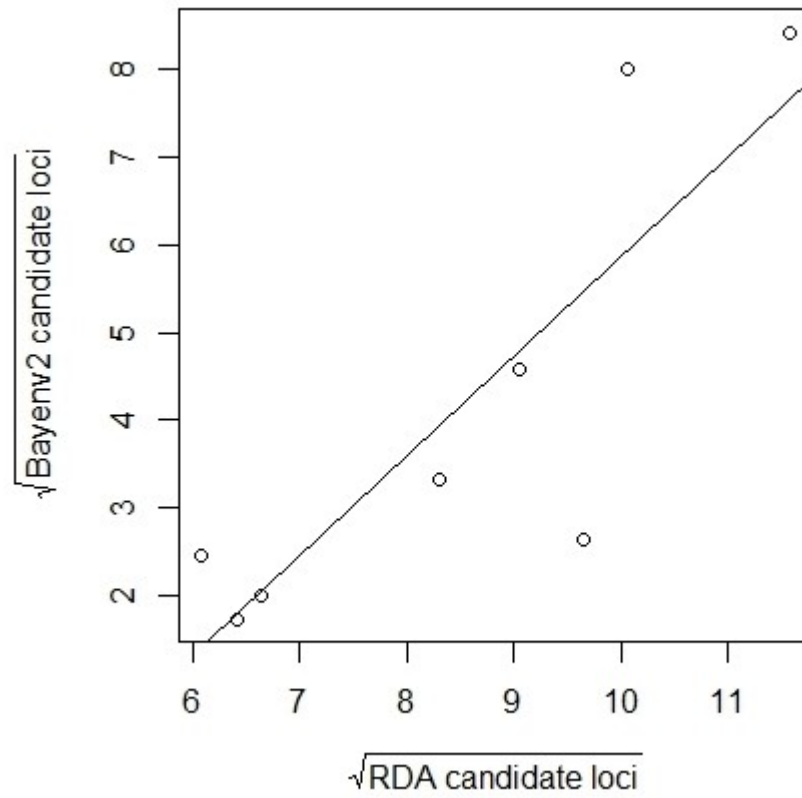

1191  
1192  
1193 **Figure S5.** Comparison of the number of the number of candidate adaptive loci identified for each  
1194 environmental predictor variable in RDA and Bayenv2 GEA analyses.

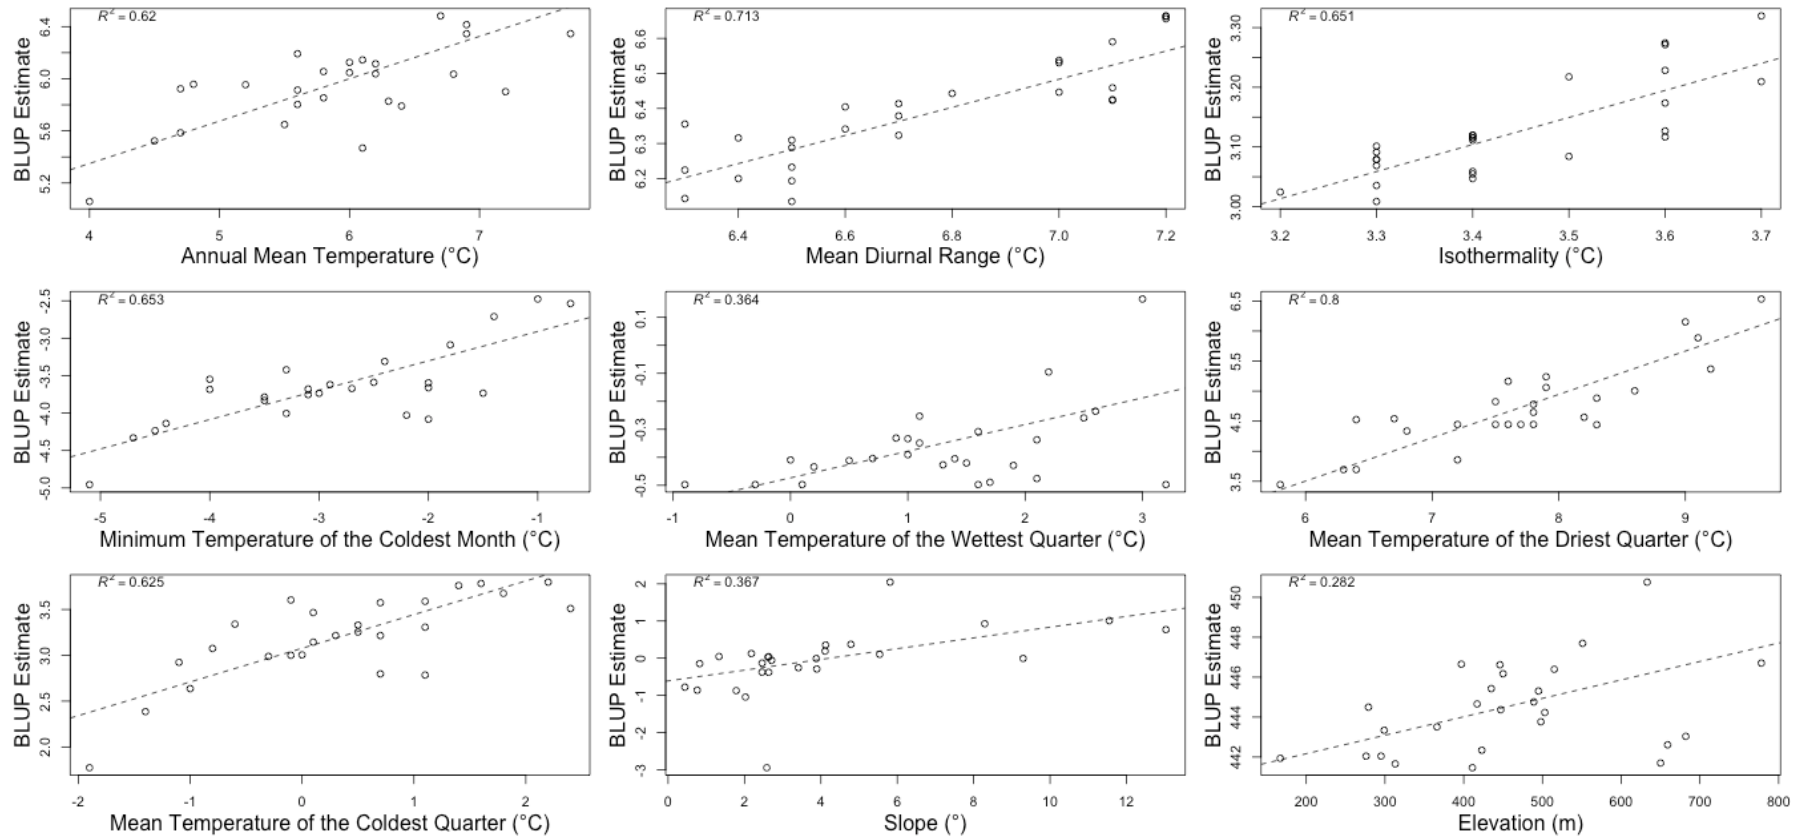

**Figure S6.** Genotype-environment association plots for nine environmental variables each with more than six associated loci, with dotted line denoting theoretical optimum genotype.

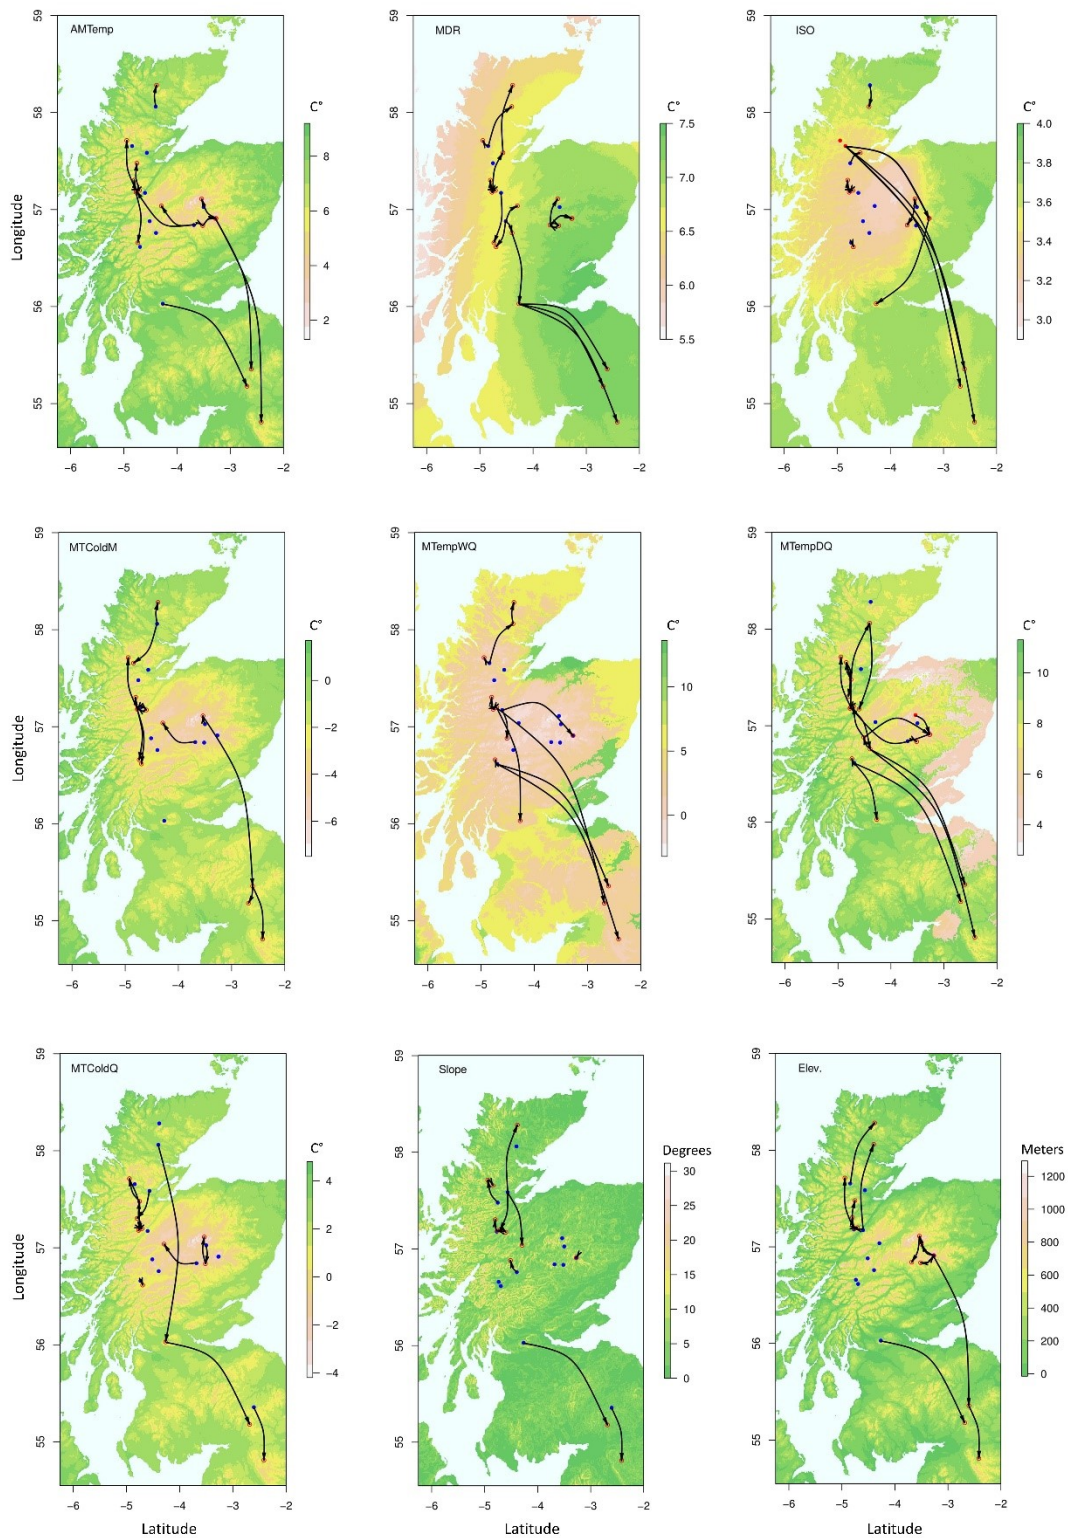

**Figure S7.** Assisted gene flow maps for nine environmental variables with more than six significantly associated loci.

## Additional References

Borrell, J.S., Wang, N., Nichols, R.A., Buggs, R.J.A., 2018. Genetic diversity maintained among fragmented populations of a tree undergoing range contraction. *Heredity (Edinb)*. 121, 304–318. <https://doi.org/10.1038/s41437-018-0132-8>

Dixon, P., 2003. VEGAN, a package of R functions for community ecology. *J. Veg. Sci.* 14, 927–930. <https://doi.org/10.1111/j.1654-1103.2003.tb02228.x>

Excoffier, L., Lischer, H.E.L., 2010. Arlequin suite ver 3.5: A new series of programs to perform population genetics analyses under Linux and Windows. *Mol. Ecol. Resour.* 10, 564–567. <https://doi.org/10.1111/j.1755-0998.2010.02847.x>

Forester, B.R., Lasky, J.R., Wagner, H.H., Urban, D.L., 2018. Comparing methods for detecting multilocus adaptation with multivariate genotype–environment associations. *Mol. Ecol.* 27, 2215–2233. <https://doi.org/https://doi.org/10.1111/mec.14584>

Legendre, P., Legendre, L., 2012. *Numerical Ecology*, 3rd editio. ed. Elsevier, Amsterdam.

Oksanen, J., Blanchet, F.G., Kindt, R., Legendre, P., Minchin, P.R., O’Hara, R.B., Simpson, G.L., Solymos, P., Stevens, M.H.M., Wagner, H., 2019. Package “vegan”: Community ecology package.

Rellstab, C., Gugerli, F., Eckert, A.J., Hancock, A.M., Holderegger, R., 2015. A practical guide to environmental association analysis in landscape genomics. *Mol. Ecol.* 24, 4348–4370. <https://doi.org/10.1111/mec.13322>

Schweizer, R.M., Vonholdt, B.M., Harrigan, R., Wayne, R.K., 2016. Genetic subdivision and candidate genes under selection in North American grey wolves 380–402. <https://doi.org/10.1111/mec.13364>
